1

2

3

4 **Feature analysis of joint motion while reaching the occiput in patients with mild**

5 **hemiplegia: a cross-sectional study**

6

7

8 **Short title:** Kinematic characteristics of reaching the occiput in hemiplegia

9

10

11 Daigo Sakamoto<sup>1,2</sup>, Toyohiro Hamaguchi<sup>2\*</sup>, Naohiko Kanemura<sup>2</sup>, Takashi Yasojima<sup>2</sup>, Keisuke

12 Kubota<sup>3</sup>, Ryota Suwabe<sup>1</sup>, Yasuhide Nakayama<sup>4</sup>, Masahiro Abo<sup>4\*</sup>

13

14 <sup>1</sup> Department of Rehabilitation Medicine, The Jikei University School of Medicine Hospital,

15 Tokyo, Japan

16 <sup>2</sup> Department of Rehabilitation, Graduate School of Health Science, Saitama Prefectural

17 University, Saitama, Japan

18 <sup>3</sup> Research Development Center, Saitama Prefectural University, Saitama, Japan

19 <sup>4</sup> Department of Rehabilitation Medicine, The Jikei University School of Medicine, Tokyo,

20 Japan

21

22 \* Corresponding authors

23 E-mail: [hamaguchi-toyohiro@spu.ac.jp](mailto:hamaguchi-toyohiro@spu.ac.jp) (TH), [abo@jikei.ac.jp](mailto:abo@jikei.ac.jp) (MA)

## 25 **Abstract**

26           This cross-sectional study aimed to clarify the kinematic characteristics of reaching  
27 the occiput in patients with mild hemiplegia. Ten patients with post-stroke hemiplegia who  
28 attended the Department of Rehabilitation Medicine of the Jikei University Hospital and met the  
29 eligibility criteria were included. Reaching motion to the back of the head by the participants'  
30 paralyzed and non-paralyzed upper limbs was measured using three-dimensional motion  
31 analysis, and the motor time, joint angles, and angular velocity were calculated. Multivariate  
32 analysis of covariance was performed on these data. After confirming the fit to the binomial  
33 logistic regression model, the cutoff values were calculated using the receiver operating  
34 characteristic curve. The cutoff values for the movement until the hand reached the back of the  
35 head were 1.6 s for the motor time, 55° for the maximum shoulder joint flexion angle, and 145°  
36 for the maximum elbow joint flexion angle. The cutoff values for the movement from the back  
37 of the head to the hand being returned to its original position were 1.6 s for the motor time, 145°  
38 for the maximum elbow joint flexion angle, 53°/s for the maximum angular velocity of shoulder  
39 joint abduction, and 62°/s for the maximum angular velocity of elbow joint flexion. The  
40 numbers of clusters were three, four, and four for the outward non-paralyzed side, outward and  
41 return paralyzed side, and return non-paralyzed side, respectively. The findings obtained by this  
42 study can be used for practice planning in patients with mild hemiplegia who aim to improve the  
43 reaching motion to the occiput.

44

## 45 **Introduction**

46           Stroke affects 14 million individuals annually worldwide, and 80 million people live  
47 with the aftereffects of stroke [1]. Motor paralysis, a sequela of stroke, occurs in approximately  
48 80% of patients [2]. As motor paralysis of the upper limbs and fingers limits patients' activities

49 of daily living (ADLs) and decreases their quality of life (QOL), patients are provided with  
50 continuous rehabilitation to improve motor paralysis [3,4].

51 Reaching the occiput is an important exercise for achieving rehabilitation. Reaching is  
52 a fundamental movement of the upper limb, with the goal of reaching the target point [5].  
53 Although there are various target points for reaching, such as a space or an object on a desk, a  
54 reach whose target point is one's body has a direct influence on self-care performance. The  
55 movement of the hand to the back of the head is included in movements for grooming, such as  
56 washing, tying hair, and putting on and taking off clothes, ornaments and hats [6]. Improving  
57 the patient's appearance positively affects their QOL through social participation, such as going  
58 out and socializing. Reaching the back of the head requires a wide range of motion and  
59 coordinated joint movement of the shoulder and elbow joints and is a difficult task for patients  
60 with motor paralysis; therefore, even if the patient's motor paralysis is mild, smooth movement  
61 requires practice [7,8]. Therefore, therapists monitor changes in patients owing to exercise and  
62 treatment and provides further treatment based on the evaluation.

63 Clinically, the arm function test, manual function test, and action research arm test  
64 (ARAT) are used for upper extremity function assessment to observe the reach to the occiput  
65 include [9–11]. In these tests, the examiner observes whether the patient can perform the task  
66 and the reaching position of the patient's hand at the end of the motor limb; the test is scored  
67 using an ordinal scale. However, as the human body has redundant degrees of freedom, multiple  
68 combinations of joint motions exist, even when the final hand position is the same [12].  
69 Specifically, in patients with hemiplegia after stroke, synergistic patterns may emerge, and  
70 compensatory movements may be used [13]. In patients with motor paralysis, even if reaching  
71 the occiput is possible, the motion trajectory may be prolonged and the motion time may be  
72 delayed. The scores obtained using the clinically used evaluation methods alone are difficult to  
73 refer to when planning exercises to change a patient's joint movement patterns or shorten the  
74 motor time of exercises.

75 Three-dimensional motion analysis is used for analyzing upper limb movement  
76 characteristics in patients with stroke [14]. In this method, markers are attached to landmarks on  
77 the body and upper limb movements are recorded using an infrared camera and analyzed.  
78 Studies have been conducted to analyze the joint motion and motion time of patients with stroke  
79 using three-dimensional motion analysis [15–18]. In these studies, reaching a target placed in  
80 front or on a desk is occasionally set as the measurement task. However, it is difficult to utilize  
81 the obtained results for practice because of the discrepancy between the results and the upper  
82 limb movements in daily activities [19]. As the tasks are measured in a manner that is close to  
83 daily life situations, the results can be easily applied to the treatment of patients [20,21]. Several  
84 studies have evaluated healthy participants and patients with orthopedic diseases in terms of  
85 their ability to reach the occipital region; however, the kinematic characteristics of patients with  
86 stroke with mild motor paralysis have not been verified [7,8,22]. The data on the kinematic  
87 characteristics of patients with stroke with regard to reaching backward to the occiput would  
88 provide a useful basis for devising a practice method for those who aim to acquire ADLs,  
89 including reaching backward to the occiput. When upper limb motor tasks are measured using a  
90 three-dimensional motion analyzer, the motions of the paralyzed and non-paralyzed sides should  
91 be compared [23]. The movements of the non-paralytic upper limb in patients with hemiplegia  
92 after stroke differ from those of normal participants; however, the non-paralytic upper limb,  
93 which does not show obvious functional impairment, can be used in clinical situations for  
94 comparison with the paralytic upper limb [23,24]. In a recent study, accelerometers, gyroscopic  
95 sensors, and magnetic sensors were attached to the bodies of patients with stroke. The results of  
96 four types of forward reaching were compared between the paralyzed and non-paralyzed upper  
97 limbs using three-dimensional motion analysis to obtain evaluation values for patients with mild  
98 hemiplegia based on the motor time and joint angle of the non-paralyzed side of the upper limb  
99 [25]. Three-dimensional motion analysis is clinically useful because the motion of the non-

100 paralyzed upper limb is referenced, and the joint motion patterns of the paralyzed upper limb  
101 can be used to devise isolation exercises to be practiced [19].

102           Based on the above discussion, in this study, we aimed to clarify the kinematic  
103 characteristics of patients with mild hemiplegia in the chronic phase while reaching the occipital  
104 region using three-dimensional motion analysis. Our results will provide a basis for devising  
105 motor targets and effective exercises to reach the occiput in patients with posterior upper limb  
106 hemiplegia.

107

## 108 **Materials and methods**

### 109 **Study design**

110           In this cross-sectional study, kinematic data of patients with post-stroke hemiplegia  
111 were obtained while reaching the hand to the back of the head, and the patient's paralyzed and  
112 non-paralyzed upper limbs were compared.

113

### 114 **Ethical considerations**

115           All patients provided written informed consent to participate in this study. This study  
116 was approved by the Ethics Committee of the Jikei University School of Medicine (approval  
117 number: 22-061-6238).

118

### 119 **Participants**

120           Patients with post-stroke hemiplegia who attended the Department of Rehabilitation  
121 Medicine of the Jikei University Hospital between May 1 to October 30, 2020, cases where at  
122 least 6 months had passed since the onset of stroke, patients aged  $\geq 20$  years, and those with a

123 total score of  $\geq 47$  points in the Fugl–Meyer assessment of the upper extremity (FMA-UE) or  
124 with a gross movement score of  $\geq 6$  points in the ARAT, were included. The 47 points achieved  
125 in the FMA-UE is the cutoff for mild motor paralysis in the severity classification of motor  
126 paralysis reported by Woodbury et al. [26]. The gross movement in the ARAT includes a task to  
127 reach the back of the head, and 6 points of gross movement is the threshold for patients who can  
128 perform this movement [10]. The exclusion criteria were as follows: cases with a paralyzed  
129 hand not reaching the external occipital ridge with automatic movements; presence of a central  
130 nervous system disease other than stroke, orthopedic disease, mental disorder, higher brain  
131 dysfunction, dementia, visual field disorder, and ataxia at diagnosis; subluxation of the shoulder  
132 joint; pain in the joints of the upper limb or fingers during exercise; presence of a significant  
133 limitation in the joint range of motion in the upper limb; and completion of the occupational  
134 therapy intervention. Patients who met the study eligibility criteria but did not meet the  
135 exclusion criteria were asked to participate in the study, and those who provided consent were  
136 considered participants.

137

## 138 **Sample size**

139 The minimum sample size was calculated to be eight patients using G\*Power 3.1  
140 (University of Dusseldorf, Dusseldorf, Germany). To calculate the cutoff values of the  
141 kinematic data by performing binomial logistic regression analysis using the paralyzed and non-  
142 paralyzed upper limbs as nominal variables in patients with hemiplegia, data from previous  
143 studies [27], in which the primary assessment was the joint angle, were referenced. The sample  
144 size was calculated by setting the difference from the constant (binomial test, one sample case).  
145 For calculating the required sample size, the effect size was 0.4,  $\alpha$  was 0.05, power (1- $\beta$ ) was  
146 0.8, and constant proportion was 0.5.

147

## 148 Survey period

149 The acquisition of patients' medical information, clinical evaluation, and measurement  
150 of motor tasks began on October 1, 2020, and ended on October 1, 2021.

151

## 152 Experimental procedure

153 The examiner affixed infrared reflective markers at 35 points on the participant's body  
154 according to the Plug-in Gait marker model (Fig 1). Infrared reflective markers were applied by  
155 a single examiner similarly in all participants according to the following procedure: the  
156 examiner made the participants sit on a backless chair with their elbow joints fully extended,  
157 their forearms in the middle, and their upper limbs drooped. The examiner adjusted the height  
158 and position of the chair such that the participants' forearms and fingers did not touch the chair,  
159 and the flexion angles of the knee and hip joints were 90°. The participants sat on a height-  
160 adjusted chair with their feet shoulder-width apart and both soles of their feet on the floor. Six  
161 thermal imaging cameras were placed on the ceiling of the room, and a landmark was placed 5  
162 m away from the participants (Fig 2).

163

164 **Fig 1. Attachment positions of the markers.** (a) Frontal image and (b) rear image.

165

166 Markers were affixed at 35 points on the bodies of the participants. On the head, they  
167 were placed at four bilateral anterolateral and posterolateral points; on the trunk, they were  
168 placed at five points on the upper sternal body, lower sternal spine, seventh cervical vertebra,  
169 10th thoracic vertebra, and right posterior back; and on the pelvis, at four points on the bilateral  
170 anterior and posterior superior iliac spines. On the upper limbs, they were affixed at 10 points  
171 on the bilateral upper acromion, lateral olecranon, radial and ulnar eminence, and the head of

172 the second metacarpal. On the lower limbs, they were affixed at 12 points on the bilateral femur,  
173 lateral patella, tibia, calcaneus, external calcaneus, and head of the second metatarsal bone.

174

175 **Fig 2. Measurement environment and starting limb position.** (a) Top view and (b) side view.

176

## 177 **Reaching task**

178 The starting position of the upper limb on the measurement side was set with the  
179 elbow in full extension, forearm in mid-extension, and fingers in extension, with the forearm  
180 and fingers not in contact with the chair. The upper limb on the non-tested side was also placed  
181 in the same position. If the starting position was difficult to achieve owing to paralysis and  
182 muscle tone, the participants were reminded to relax the muscles of the upper limbs and fingers,  
183 and the upper limbs were allowed to droop as much as possible (Fig 2b).

184 The reaching task involved placing the palmar aspect of the hand (the palmar aspect of  
185 the second metacarpal) in contact with the center of the external occipital ridge. The examiner  
186 provided the following verbal instructions to all participants: “touch the center of the occiput  
187 with the palm of the hand”; “return the upper limbs to the starting posture; maintain the head,  
188 neck, and trunk as still as possible while looking at the landmarks placed in front during the  
189 measurement”; and “move the arms as usual without any particular awareness of speed.”  
190 Flexion of the fingers during the reaching motion was allowed. The examiner asked the  
191 participants to perform the exercise several times and checked whether they understood the  
192 instructions correctly.

193 Measurements were performed on the paralyzed and non-paralyzed sides, in that  
194 order, five times each for a total of 10 measurements (Fig 3). A 1-min rest period was allowed  
195 between the measurements. Before each measurement, the examiner verified whether the  
196 participants were in the correct starting position. The order of the measurements did not change,



197 and all participants underwent measurements in the same manner. During the rest period, the  
198 participants were allowed to stretch the muscles by themselves but were not allowed to receive  
199 any therapeutic intervention from the therapist.

200

201 **Fig 3. Measurement sequence.**

202

## 203 **Data acquisition and analysis**

204 The reaching task was analyzed using an optical three-dimensional motion analyzer  
205 (Vicon motion system; Oxford, UK). Data were recorded at a sampling rate of 100 Hz using six  
206 infrared cameras mounted on the ceiling of the examination room. The displacement  
207 information for each marker was compiled in three dimensions using parallax images from the  
208 six cameras, converted into positions (x, y, and z) in the same virtual space, and recorded on a  
209 personal computer for analysis. The motion was divided into an outward motion from the  
210 starting position until the hand reached the occiput (outward motion) and a return motion from  
211 the point when the hand reached the occiput until it returned to its original position (return  
212 motion). The onset of the outward and return motions was defined as the time when the position  
213 data of the index finger marker in the three-dimensional space changed continuously for 0.2 s,  
214 and the end of the movement was defined as the time when the position data of the index finger  
215 marker recorded the same value continuously for 0.2 s [28].

216 A whole-body rigid-body linkage model was constructed from the acquired reflective  
217 marker information using the Plug-in gait model specified by the Vicon motion system [29].  
218 The flexion and abduction angles of the shoulder joint as well as the flexion angle of the elbow  
219 joint were calculated using the Eulerian method, in which the joint angles are calculated from  
220 the distal body segment coordinates in motion relative to the proximal body segment  
221 coordinates. The angular velocity was calculated by dividing the change in the joint angle by the

222 time of motion. The displacements of the markers attached to the sternal pattern and occiput on  
223 the same side as the measured upper limb during the measurement were calculated using the  
224 position data in three-dimensional space. The mean, standard deviation, and maximum and  
225 minimum values of the joint angles and angular velocities of shoulder flexion and abduction and  
226 elbow flexion, and displacements of the sternal pattern and occipital markers were calculated  
227 separately for outward and return motions.

228

## 229 **Clinical evaluation**

230 The FMA was used to assess the motor paralysis of the participants. The FMA is a  
231 comprehensive evaluation battery that tests motor function, balance, sensory function, joint  
232 range of motion, and the degree of joint pain in patients with post-stroke hemiplegia [30]. Upper  
233 and lower extremity motor function (FMA of the lower extremity [FMA-LE]) items can be used  
234 in excerpts and assess isolated movements in accordance with the recovery phase of motor  
235 paralysis. The FMA-UE is scored on a 66-point scale, and the FMA-LE is scored on a 34-point  
236 scale on a 3-point ordinal scale. The FMA-UE has been reported to classify the severity of  
237 motor paralysis, and the severity of motor paralysis was investigated in the present study based  
238 on the classification given by Woodbury et al. [26]. The ARAT and Box and Block Test (BBT)  
239 were used to assess the participant's ability to manipulate objects. The ARAT is an upper limb  
240 function assessment tool, which was developed based on the upper extremity test [31]. The  
241 ARAT consists of grasp, grip, pinch, and gross movement subtests and is scored on a 4-point  
242 ordinal scale on a 57-point scale [10]. The BBT is used to evaluate hand dexterity. The task is to  
243 move 100 blocks from one compartment of a box to the opposite compartment one by one  
244 across a partition [32,33]. In this test, the number of blocks moved per minute is measured. The  
245 modified Ashworth scale (mAs) was used to assess the muscle tone of the study participants.  
246 The mAs is used to evaluate spasticity, a symptom of abnormal muscle tone in central nervous

247 system diseases [34]. In this test, the resistance to rapid movement of the joints in an alternating  
248 manner is evaluated on a 6-point scale. In this study, the biceps brachii muscle of the paralyzed  
249 side of the participants was evaluated. The Berg balance scale (BBS) and the functional reach  
250 test (FRT) were used to assess the participant's balance function. The BBS is used to evaluate  
251 the functional balance ability and is useful as an indicator of walking independence and fall  
252 prediction [35,36]. The test is scored on a 5-point ordinal scale on a 56-point scale. The FRT is  
253 a balance ability assessment that measures the distance of the forward reach of the upper limb in  
254 the standing position without changing the basal plane of support [37]. In this work, the FRT  
255 was performed three times, and the mean value was calculated. The Semmes–Weinstein  
256 monofilament test (SWT) and the thumb search test (TST) were used to evaluate the sensory  
257 function of the participants. The SWT is used to examine static tactile sensations related to  
258 object properties, discrimination ability, and sustained grasping [38]. In this test, five types of  
259 nylon filaments with different diameters are used to stimulate the skin, and the participant's  
260 responses are evaluated. The TST is used to evaluate the joint localization of the upper limb  
261 [39]. This test integrates the proprioceptive information of each joint of the upper limb and  
262 evaluates the perception of thumb position in space on a 4-point ordinal scale. The Barthel  
263 Index (BI) was used to assess participants' daily functioning in this study. The BI is used to  
264 assess the level of independence in performing ADLs [40]. The test consists of 10 items, and the  
265 degree of assistance is evaluated using a 4-point ordinal scale. If the patient independently  
266 performs all items, the score is 100 points; if the patient requires full assistance for all items, the  
267 score is 0 points.

268

## 269 **Participant characteristics**

270 Basic and medical information regarding the participants, including sex, age, height,  
271 body mass index (BMI), stroke type, post-stroke duration, and paralytic side, was collected from

272 their medical records. The Edinburgh hand test was used to examine the handedness of the  
273 participants [41]. This test consists of 10 questions, in which the participants are asked which  
274 hand they use to perform ADLs. A positive index indicates right-handedness, whereas a  
275 negative index indicates left-handedness. In this study, the dominant hand before the stroke and  
276 the current dominant hand were investigated.

277

## 278 **Statistical analysis**

279 Multivariate analysis of covariance was conducted to test the hypothesis that the  
280 kinematic characteristics of reaching the back of the head in patients with mild hemiplegia in  
281 the chronic phase differ between the paralyzed and non-paralyzed upper limbs. The dependent  
282 variable was the measured side of the reaching task, and the independent variables were motor  
283 time, maximum values of joint angles, and angular velocities of shoulder flexion and abduction  
284 and elbow flexion. The covariates included sex, age, BMI, time since stroke onset, maximum  
285 displacement of the sternal pattern, and occipital markers. Statistical analyses were conducted  
286 separately for the outbound and return motions. Binomial logistic regression analysis was  
287 conducted on the features fitted to the model for the paralyzed and non-paralyzed sides using  
288 multivariate analysis of covariance. After confirming the fit of the binomial logistic regression  
289 model, Youden's index was calculated using the receiver operating characteristic (ROC) curve,  
290 and the cutoff value to discriminate between the paralyzed and non-paralyzed sides was  
291 calculated. The calculated cutoffs, especially the area under the curve (AUC) values, were  
292 compared using the DeLong test [42]. The dependent variables were the paralyzed and non-  
293 paralyzed sides, and the independent variables were the characteristics that showed significant  
294 differences between the paralyzed and non-paralyzed sides in the multivariate analysis. The  
295 covariates included sex, age, BMI, post-onset period, and the maximum displacement values of

296 sternal pattern markers and occipital markers. For these analyses, jamovi version 2.2.1  
297 (<https://www.jamovi.org>) was used.

298 Pattern identification using random forest clustering was performed to analyze the  
299 pattern of changes in the joint angle on the paralyzed and non-paralyzed sides of reaching the  
300 occipital region. Random forest clustering is an algorithm that divides the data into several  
301 clusters, virtually partitioning the data such that each observation belongs to only one group.  
302 The clustering method is an unsupervised method that uses the random forest algorithm,  
303 wherein the dependent variable  $y$  is set as  $T$ , the number of decision trees, and the machine is  
304 trained with each motor data input as unlabeled data with and without motor paralysis (Equation  
305 1). The random forest algorithm generates a proximity matrix that estimates the distance  
306 between the observations based on the frequency of observations ending at the same leaf node  
307 (Equation 2). These data consist of continuous variables [43–45].

308

309  $(x,y) = (x_1,x_2,x_3,\dots,x_k,y) \dots$  (Equation 1)

310  $IG(D_p, f) = I(D_p) - \frac{N_{left}}{N_p}I(D_{left}) - \frac{N_{right}}{N_p}I(D_{right}) \dots$ (Equation 2)

311

312 In Equation 1,  $x$  is the reference dataset and  $y$  is the dependent variable. In Equation 2,  
313  $D_p$  is the parent dataset,  $f$  is the number of explanatory variables,  $N$  is the depth of the decision  
314 tree,  $D_{left}$  is the left child node from the parent node,  $D_{right}$  is the right child node from the parent  
315 node, and  $I$  is the impurity. The variables used were the motor time and shoulder flexion,  
316 shoulder abduction, and elbow flexion angles. Each variable  $C$  was assigned a discrete-valued  
317 class label, that is,  $C_0, C_1, C_2, \dots, C_n$ , using random forest clustering. The motor patterns were  
318 clustered for four conditions: outward and return motions on the paralyzed and non-paralyzed  
319 sides of the reach to the occipital region. The number of clusters was determined using the  
320 elbow method. The elbow method plots the sum of squares of the intra-cluster error for each  
321 cluster and considers the point where the value sharply decreases to be the optimal number of

322 clusters [46]. The clustering structure of these four conditions is illustrated and is considered a  
323 unique pattern underlying the motion data. JASP version 0.16 (<https://jasp-stats.org/>) was used  
324 to identify these patterns. The statistical significance level was set at 5%.

325

## 326 **Results**

### 327 **Participants**

328 In total, 88 patients with chronic stroke had a history of intervention in the previous 6  
329 months. Among these patients, three were aged <20 years, and 60 had FMA-UE or ARAT  
330 scores below the inclusion criteria. One patient was diagnosed with higher brain dysfunction,  
331 two had ataxia, two had shoulder subluxation, and seven completed the occupational therapy  
332 intervention. Of the 88 patients, 75 were excluded and 13 met the inclusion criteria set for the  
333 study. These 13 patients were asked to participate in the study; three patients who did not agree  
334 to participate were excluded; therefore, 10 patients were included in the final analysis (Fig 4).

335

336 **Fig 4. Patient selection procedure.**

337

### 338 **Descriptive data**

339 The characteristics of the participants and the survey results are presented in Table 1.  
340 In total, 10 participants were included, of whom three were female and seven were male  
341 individuals. All the participants had right hemiplegia. The right hand was dominant in 10  
342 participants before the onset of FMA-UE and changed to the left hand in five of 10 participants  
343 after the onset of FMA-UE. The severity of FMA-UE was moderate in one patient and mild in  
344 nine patients. One participant classified as moderate met the eligibility criterion of at least 6  
345 points for gross movement on the ARAT. The median scores of all the participants were 34

346 points on the ARAT and 24 points on the paralytic side in the BBT. Eight and two patients had  
 347 mAs scores of 1 and 1+, respectively. None of the patients showed severe spasticity. The FMA-  
 348 LE score, BBS score, and FRT were 28 points, 55 points, and 33 cm, respectively. The  
 349 participants had good lower limb, trunk, and balance functions. The SWT was normal in seven  
 350 participants and lowered in three, while the TST was normal in nine participants and lowered in  
 351 one; there was no significant decrease in the superficial or deep sensation in the participants. All  
 352 participants had a BI score of 100 points and independently performed all daily activities.  
 353

**Table 1. Clinical characteristics of the patients.**

| Characteristics          |       | Female        | Male          | All           |
|--------------------------|-------|---------------|---------------|---------------|
| Participants             |       | 3 (30)        | 7 (70)        | 10 (100)      |
| Age (years)              |       | 50 [35–51]    | 46 [46–55]    | 48 [45–51]    |
| Height (cm)              |       | 154 [152–159] | 170 [169–173] | 169 [164–171] |
| Weight (kg)              |       | 51 [51–56]    | 72 [66–77]    | 66 [55–73]    |
| BMI (kg/m <sup>2</sup> ) |       | 23 [21–24]    | 25 [22–26]    | 25 [20–25]    |
| Time from onset (months) |       | 59 [37–83]    | 53 [38–78]    | 54 [34–91]    |
| Diagnosis                | CI    | 3 (100)       | 3 (43)        | 6 (60)        |
|                          | ICH   | 0 (0)         | 4 (57)        | 4 (40)        |
| Paralyzed side           | Left  | 0 (0)         | 0 (0)         | 0 (0)         |
|                          | Right | 3 (100)       | 7 (100)       | 10 (100)      |
| Dominant hand            |       |               |               |               |
| Before onset             | Left  | 0 (0)         | 0 (0)         | 0 (0)         |
|                          | Right | 3 (100)       | 7 (100)       | 10 (100)      |
| After onset              | Left  | 2 (67)        | 3 (43)        | 5 (50)        |
|                          | Right | 1 (33)        | 4 (57)        | 5 (50)        |

|                                             |                    |            |            |            |
|---------------------------------------------|--------------------|------------|------------|------------|
| FMA-UE                                      |                    | 56 [52–57] | 57 [55–60] | 57 [55–58] |
| FMA-UE severity                             |                    |            |            |            |
| Moderate ( $20 \leq \text{score} \leq 46$ ) |                    | 0 (0)      | 1 (14)     | 1 (10)     |
| Mild ( $\text{score} \geq 47$ )             |                    | 3 (100)    | 6 (86)     | 9 (90)     |
| FMA-LE                                      |                    | 28 [25–28] | 30 [28–31] | 28 [28–30] |
| <hr/>                                       |                    |            |            |            |
| ARAT                                        |                    | 31 [23–34] | 43 [28–50] | 34 [27–45] |
| <hr/>                                       |                    |            |            |            |
| BBT                                         | Paralyzed side     | 22 [12–25] | 25 [10–38] | 24 [7–28]  |
|                                             | Non-paralyzed side | 53 [53–56] | 59 [53–61] | 57 [53–60] |
| <hr/>                                       |                    |            |            |            |
| mAs                                         | 0                  | 0 (0)      | 0 (0)      | 0 (0)      |
|                                             | 1                  | 2 (67)     | 6 (86)     | 8 (80)     |
|                                             | 1+                 | 1 (33)     | 1 (14)     | 2 (20)     |
| <hr/>                                       |                    |            |            |            |
| BBS                                         |                    | 55 [54–55] | 56 [55–56] | 55 [55–56] |
| FRT (cm)                                    |                    | 29 [28–30] | 38 [33–40] | 33 [29–39] |
| <hr/>                                       |                    |            |            |            |
| SWT                                         | Normal             | 3 (100)    | 4 (57)     | 7 (70)     |
|                                             | Decline            | 0 (0)      | 3 (43)     | 3 (30)     |
| <hr/>                                       |                    |            |            |            |
| TST                                         | Normal             | 3 (100)    | 6 (86)     | 9 (90)     |
|                                             | Decline            | 0 (0)      | 1 (14)     | 1 (10)     |
| <hr/>                                       |                    |            |            |            |
| BI                                          |                    | 100 [100]  | 100 [100]  | 100 [100]  |

Values are expressed as numbers (%) or medians [25<sup>th</sup>–75<sup>th</sup> percentile].

ARAT, action research arm test; BBS, Berg balance scale; BBT, Box and Block Test; BI, Barthel Index; BMI, body mass index; CI, cerebral infarction; FMA-LE, Fugl-Meyer assessment of the lower extremity; FMA-UE, Fugl-Meyer assessment of the upper extremity; FRT, functional reach test; ICH, intracranial hemorrhage; mAs, modified Ashworth scale; SWT, Semmes-Weinstein monofilament test; TST, thumb search test.



## 355 **Outcome data**

356            Tables 2 and 3 present the results for the kinematic data on outward and inward  
357 reaching motions. Fig 5 shows the changes in the joint angles of shoulder flexion, shoulder  
358 abduction, and elbow flexion during the outward and return motions of the reaching motion.

**Table 2. Outward motion of the reaching task: results of multivariate analysis of covariance.**

| Descriptive statistics      |                  | Paralyzed side |       |       |        | Non-paralyzed side |       |       |       | F     | p      |
|-----------------------------|------------------|----------------|-------|-------|--------|--------------------|-------|-------|-------|-------|--------|
|                             |                  | Mean           | SD    | Min   | Max    | Mean               | SD    | Min   | Max   |       |        |
| Motor time (s)              |                  | 2.3            | 0.7   | 1.5   | 4.4    | 1.3                | 0.3   | 0.9   | 1.9   | 136.6 | <0.001 |
| Peak angle (°)              | Shoulder flex    | 48.9           | 15.4  | 24.4  | 75.1   | 42.3               | 11.2  | 23.2  | 59.5  | 15.3  | <0.001 |
|                             | Shoulder abd     | 117.5          | 16.7  | 88.8  | 156.8  | 118.9              | 6.2   | 102.7 | 129.2 | 0.3   | 0.560  |
|                             | Elbow flex       | 134.2          | 8.0   | 113.0 | 145.0  | 140.0              | 6.1   | 120.6 | 145.6 | 19.5  | <0.001 |
| Peak angular velocity (°/s) | Shoulder flex    | 213.6          | 190.8 | 71.8  | 893.6  | 180.5              | 88.5  | 70.6  | 524.8 | 1.4   | 0.237  |
|                             | Shoulder abd     | 306.0          | 249.4 | 90.3  | 1116.3 | 271.3              | 109.6 | 142.6 | 792.5 | 0.9   | 0.339  |
|                             | Elbow flex       | 211.6          | 118.6 | 80.6  | 658.6  | 252.9              | 142.5 | 115.3 | 887.0 | 2.9   | 0.090  |
| Displacement (mm)           | Manubrium        | 4.8            | 4.7   | 0.5   | 16.4   | 2.9                | 4.4   | 0.4   | 29.3  | -     | -      |
|                             | Back of the head | 1.0            | 19.9  | 1.8   | 141.2  | 8.5                | 6.0   | 0.5   | 24.2  | -     | -      |

abd, abduction; flex, flexion; Max, maximum; Min, minimum; SD, standard deviation.

Multivariate analysis of covariance was used, with the statistical significance set at 0.05 (N = 10). The manubrium and back of the head displacements were used as covariates.

**Table 3. Return motion of the reaching task: results of multivariate analysis of covariance.**

| Descriptive statistics      |                  | Paralyzed side |       |       |        | Non-paralyzed side |      |       |       | F    | p      |
|-----------------------------|------------------|----------------|-------|-------|--------|--------------------|------|-------|-------|------|--------|
|                             |                  | Mean           | SD    | Min   | Max    | Mean               | SD   | Min   | Max   |      |        |
| Motor time (s)              |                  | 2.3            | 0.7   | 1.5   | 4.2    | 1.5                | 0.3  | 1.0   | 2.2   | 98.4 | <0.001 |
|                             | Shoulder flex    | 50.3           | 15.1  | 25.2  | 70.2   | 46.9               | 12.8 | 23.9  | 71.9  | 3.7  | 0.057  |
| Peak angle (°)              | Shoulder abd     | 116.9          | 16.2  | 89.2  | 156.6  | 121.1              | 6.9  | 102.7 | 139.0 | 3.2  | 0.075  |
|                             | Elbow flex       | 134.2          | 8.1   | 110.3 | 145.1  | 140.0              | 6.1  | 120.5 | 145.0 | 19.0 | <0.001 |
|                             | Shoulder flex    | 122.7          | 103.4 | 13.1  | 405.6  | 79.2               | 43.9 | 17.6  | 235.6 | 7.4  | 0.008  |
| Peak angular velocity (°/s) | Shoulder abd     | 81.7           | 87.1  | -4.3  | 359.7  | 34.2               | 32.3 | -5.6  | 132.9 | 13.9 | <0.001 |
|                             | Elbow flex       | 95.4           | 98.1  | -1.0  | 428.5  | 48.9               | 41.8 | -12.1 | 187.5 | 9.4  | 0.003  |
| Displacement (mm)           | Manubrium        | 29.6           | 167.6 | 0.5   | 1190.0 | 4.1                | 4.9  | 0.5   | 19.6  | -    | -      |
|                             | Back of the head | 9.1            | 20.2  | 1.4   | 145.4  | 5.9                | 4.4  | 0.7   | 19.4  | -    | -      |

abd, abduction; flex, flexion; Max, maximum; Min, minimum; SD, standard deviation.

Multivariate analysis of covariance was used, with the statistical significance set at 0.05 (N = 10). The displacements of the manubrium and back of the head were used as covariates.

361 **Fig 5. Changes in the joint angle during the reaching motion.** (a) Changes in the shoulder  
362 flex angle, (b) changes in the shoulder abd angle, (c) changes in the elbow flex angle while  
363 reaching the occiput, (d) changes in the shoulder flex angle, (e) changes in the shoulder abd  
364 angle, and (f) changes in the elbow flex angle while reaching from the occiput to the starting  
365 limb position. abd, abduction; flex, flexion.

366

## 367 **Main findings**

### 368 **Detection of motion features**

369 Multivariate analysis of covariance was performed. For the outward motion of the  
370 reaching task, Wilks' lambda test showed a significant main effect ( $F [7, 86] = 25.1, p < 0.001$ )  
371 on the measurement side. The paralyzed side had a significantly longer motor time ( $F = 136.6, p$   
372  $< 0.001$ ). The peak shoulder flexion angle was significantly greater on the paralyzed side ( $F =$   
373  $15.3, p < 0.001$ ), and the peak elbow flexion angle was significantly greater on the non-  
374 paralyzed side ( $F = 19.5, p < 0.001$ ). There were no differences in the peak shoulder abduction  
375 angle ( $F = 0.3, p = 0.560$ ) and peak angular velocities of shoulder flexion ( $F = 1.4, p = 0.237$ ),  
376 shoulder abduction ( $F = 0.9, p = 0.339$ ), and elbow flexion ( $F = 2.9, p = 0.090$ ; Table 2). For the  
377 return motion of the reaching task, Wilks' lambda test showed a significant main effect ( $F [7,$   
378  $86] = 31.5, p < 0.001$ ) on the measured side. Motor time ( $F = 98.4, p < 0.001$ ) was significantly  
379 longer on the paralyzed side, as were the peak elbow flexion angle ( $F = 19.0, p < 0.001$ ) and the  
380 peak angular rates of shoulder flexion ( $F = 7.4, p = 0.008$ ), shoulder abduction ( $F = 13.9, p <$   
381  $0.001$ ), and elbow flexion ( $F = 9.4, p = 0.003$ ). There was no significant difference in the peak  
382 shoulder flexion angle ( $F = 3.7, p = 0.057$ ) or peak shoulder abduction angle ( $F = 3.2, p = 0.075$ ;  
383 Table 3).

384 Binomial logistic regression analysis of the model-fitted features on the paralyzed and  
385 non-paralyzed sides was performed using multivariate analysis of covariance. During the

386 outward motion, the regression model was fitted for the motor time ( $X^2 = 112, p < 0.001$ ), peak  
387 shoulder flexion angle ( $X^2 = 18.4, p = 0.010$ ), and peak elbow flexion angle ( $X^2 = 24.9, p <$   
388  $0.001$ ; Table 4 and Fig 6). During the return motion, the regression model was fitted for the  
389 motor time ( $X^2 = 87.5, p < 0.001$ ), peak elbow flexion angle ( $X^2 = 28.8, p < 0.001$ ), peak  
390 angular velocity of shoulder abduction ( $X^2 = 18.4, p = 0.01$ ), and peak angular velocity of elbow  
391 flexion ( $X^2 = 15.8, p = 0.03$ ). The peak angular velocity of shoulder flexion ( $X^2 = 11.8, p = 0.1$ )  
392 did not fit the regression model (Table 4 and Fig 7)

**Table 4. Model goodness of fit results of the binomial logistic regression analysis.**

| Model                                                                                   | Deviance      | AIC  | McFadden's R <sup>2</sup> | Overall model test |      |        | Estimate | 95% CI |       | SE   | Z     | p     |        |
|-----------------------------------------------------------------------------------------|---------------|------|---------------------------|--------------------|------|--------|----------|--------|-------|------|-------|-------|--------|
|                                                                                         |               |      |                           | X <sup>2</sup>     | df   | p      |          | Lower  | Upper |      |       |       |        |
| Reaching motion to the back of the head                                                 |               |      |                           |                    |      |        |          |        |       |      |       |       |        |
| Motor time (s)                                                                          | 26.4          | 42.4 | 0.8                       | 112                | 7    | <0.001 | 19.0     | 6.1    | 32.0  | 14.3 | -2.2  | 0.030 |        |
| Peak angle (°)                                                                          | Shoulder flex | 120  | 136                       | 0.2                | 18.4 | 7      | 0.010    | 0.01   | 0.04  | 0.2  | 0.03  | 3.1   | 0.001  |
|                                                                                         | Elbow flex    | 114  | 130                       | 0.2                | 24.9 | 7      | <0.001   | -0.2   | -0.2  | -0.1 | 0.04  | -3.7  | <0.001 |
| Reaching motion from the back of the head to the starting position                      |               |      |                           |                    |      |        |          |        |       |      |       |       |        |
| Motor time (s)                                                                          | 51.1          | 67.1 | 0.6                       | 87.5               | 7    | <0.001 | -11.2    | -21.7  | -0.7  | 5.4  | -2.1  | 0.036 |        |
| Peak angle (°)                                                                          | Elbow flex    | 110  | 126                       | 0.2                | 28.8 | 7      | <0.001   | -0.2   | -0.26 | -0.1 | 0.04  | -3.9  | <0.001 |
| Peak angular velocity (°/s)                                                             | Shoulder flex | 127  | 143                       | 0.1                | 11.8 | 7      | 0.1      | 0.01   | 0.00  | 0.01 | 0.003 | 2.1   | 0.032  |
|                                                                                         | Shoulder abd  | 120  | 136                       | 0.1                | 18.4 | 7      | 0.01     | 0.01   | 0.004 | 0.02 | 0.01  | 2.9   | 0.004  |
|                                                                                         | Elbow flex    | 123  | 139                       | 0.1                | 15.8 | 7      | 0.03     | 0.01   | 0.002 | 0.02 | 0.004 | 2.5   | 0.013  |
| abd, abduction; AIC, Akaike's information criterion; flex, flexion; SE, standard error. |               |      |                           |                    |      |        |          |        |       |      |       |       |        |

---

Binomial logistic regression was used, with the statistical significance set at 0.05 (N = 10).

---

393

394 **Fig 6. Results of the binomial logistic regression analysis for the features of reaching**  
395 **motion to the back of the head.** (a) Motor time, (b) peak angle of shoulder flex, and (c) peak  
396 angle of elbow flex. flex, flexion.

397

398 **Fig 7. Results of the binomial logistic regression analysis for the features of reaching**  
399 **motion from the occiput to the starting position.** (a) Motor time, (b) peak angle of elbow flex,  
400 (c) peak angular velocity of shoulder abd, and (d) peak angular velocity of elbow flex. abd,  
401 abduction; flex, flexion.

402

403 For features fitted to the regression model, cutoff values were calculated to  
404 discriminate between the paralyzed and non-paralyzed sides using the ROC curve. The cutoff  
405 values for the outward motion were 1.6 s for the motor time, 55° for the peak shoulder flexion  
406 angle, and 145° for the peak elbow flexion angle (Table 5). The cutoff values for the return  
407 motion were 1.6 s for the motor time, 145° for the maximum elbow flexion angle, 53°/s for the  
408 peak angular velocity of shoulder abduction, and 62°/s for the peak angular velocity of elbow  
409 flexion (Table 5). Among the cutoff values detected, the kinematic feature with the highest  
410 Youden's index was the motor time for both outward and return motions, whereas the kinematic  
411 feature with the largest AUC was the motor time for both the outward motion (AUC = 0.96, SD  
412 = 0.02,  $p = 0.00$ ) and return motion (AUC = 0.92, SD = 0.03,  $p = 0.00$ ).



**Table 5. Results of the receiver operating characteristic curve.**

| Scale                                                   | Cutoff point  | Sensitivity (%) | Specificity (%) | Youden's index | AUC  |      |
|---------------------------------------------------------|---------------|-----------------|-----------------|----------------|------|------|
| Reaching the occiput                                    |               |                 |                 |                |      |      |
| Motor time (s)                                          | 1.6           | 80              | 98              | 0.78           | 0.96 |      |
| Peak angle (°)                                          | Shoulder flex | 55              | 84              | 44             | 0.28 | 0.63 |
|                                                         | Elbow flex    | 145             | 96              | 4              | 0.00 | 0.28 |
| Reaching from the occiput to the starting limb position |               |                 |                 |                |      |      |
| Motor time (s)                                          | 1.6           | 78              | 90              | 0.68           | 0.92 |      |
| Peak angle (°)                                          | Elbow flex    | 145             | 100             | 6              | 0.06 | 0.29 |
| Peak angular velocity (°/s)                             | Shoulder abd  | 53              | 84              | 48             | 0.32 | 0.65 |
|                                                         | Elbow flex    | 62              | 74              | 56             | 0.30 | 0.67 |

abd, abduction; AUC, area under the curve; flex, flexion.

Receiver operating characteristic curve was used.

## 414 **Pattern analysis of upper limb movements**

415           The patterns of changes in the motor time and joint angle on the paralyzed and non-  
416 paralyzed sides of the reaching motion to the occipital region were analyzed using random  
417 forest clustering. Using the elbow method, the number of clusters was determined from the  
418 plotted values of the sum of the squares of the intra-cluster errors for each cluster (Fig 8). The  
419 number of clusters was determined to be four for the paralyzed side and three for the non-  
420 paralyzed side of the outward motion as well as four for the paralyzed and non-paralyzed sides  
421 of the return motion. The clustering structure for the four conditions is presented in Figs 9 and  
422 10. As an example, in the results of the motor time on the paralyzed side of the reaching motion  
423 to the occiput, four clusters are illustrated. As the abscissa is the z-value, the motor time of  
424 cluster 1 was shorter than the cutoff value. By contrast, cluster 2 had motion times within and  
425 longer than the cutoff values, and clusters 3 and 4 had longer motion times than the cutoff  
426 values. For the outward motion, the number of clusters on the paralyzed side was four (N =  
427 11,542;  $R^2 = 0.40$ ; AIC = 27,756; Bayesian information criterion [BIC] = 27,873) and that on  
428 the non-paralyzed side was three (N = 6648;  $R^2 = 0.41$ ; AIC = 15,673; BIC = 15,754). For the  
429 return motion, the number of clusters on the paralyzed side was four (N = 11,574;  $R^2 = 0.34$ ;  
430 AIC = 30,581; BIC = 30,699) and that on the non-paralyzed side was four (N = 7429;  $R^2 = 0.50$ ;  
431 AIC = 14974; BIC = 15,085; Table 6).

432

433 **Fig 8. Random forest clustering of the elbow method plot.** A plot of the intra-cluster sums of  
434 squares of errors for each cluster is shown in the figure. The number of clusters is (a) four for  
435 the paralyzed side and (b) three for the non-paralyzed side of the reaching motion to the occiput;  
436 and (c) four for the paralyzed side and (d) four for the non-paralyzed side of the reaching  
437 motion from the occiput to the starting position.

438 AIC, Akaike's information criterion; BIC, Bayesian information criterion; WSS, within sum of  
439 squares

440

441 **Fig 9. Random forest clustering of the features of reaching motion to the occiput.** The  
 442 upper panel shows the clustering structure of the (a) motor time, (b) shoulder flex angle, (c)  
 443 shoulder abd angle, and (d) elbow flex angle on the paralyzed side. In the lower panel, the  
 444 clustering structure of the (e) motor time, (f) shoulder flex angle, (g) shoulder abd angle, and (h)  
 445 elbow flex angle for the non-paralyzed side is shown. The horizontal axis of the figure indicates  
 446 the Z-values. The areas of each cluster composed of densities and absolute Z-values of each  
 447 parameter are all equal. abd, abduction; flex, flexion.

448

449 **Fig 10. Random forest clustering of the features of reaching motion from the occiput to the**  
 450 **starting position.** The upper panel shows the clustering structure of the (a) motor time, (b)  
 451 shoulder flex angle, (c) shoulder abd angle, and (d) elbow flex angle on the paralyzed side. In  
 452 the lower panel, the clustering structure of the (a) motor time, (b) shoulder flex angle, (c)  
 453 shoulder abd angle, and (d) elbow flex angle on the paralyzed side. In the lower panel, the  
 454 clustering structure of the (e) motor time, (f) shoulder flex angle, (g) shoulder abd angle, and (h)  
 455 elbow flex angle for the non-paralyzed side is shown. The horizontal axis of the figure indicates  
 456 the Z-values. The areas of each cluster composed of densities and absolute Z-values of each  
 457 parameter are all equal. abd, abduction; flex, flexion.

458

**Table 6. Results of random forest clustering.**

| Measuring side                                            | Clusters | N     | R <sup>2</sup> | AIC      | BIC      |
|-----------------------------------------------------------|----------|-------|----------------|----------|----------|
| Reaching motion to the occiput                            |          |       |                |          |          |
| Paralyzed side                                            | 4        | 11542 | 0.40           | 27756.22 | 27873.88 |
| Non-paralyzed side                                        | 3        | 6648  | 0.41           | 15673.33 | 15754.96 |
| Reaching motion from the occiput to the starting position |          |       |                |          |          |

---

|                    |   |       |      |          |          |
|--------------------|---|-------|------|----------|----------|
| Paralyzed side     | 4 | 11574 | 0.34 | 30581.45 | 30699.15 |
| Non-paralyzed side | 4 | 7429  | 0.50 | 14974.92 | 15085.53 |

---

AIC, Akaike's information criterion; BIC, Bayesian information criterion.

459

460

## 461 **Discussion**

462           In this study, a multivariate analysis of covariance was conducted to test the  
463 hypothesis that the kinematic characteristics differ between the paralyzed and non-paralyzed  
464 upper limbs when reaching the occiput in patients with mild hemiplegia in the chronic phase.  
465 During the outward reaching motion, the paralyzed side showed a significantly longer motor  
466 time and significantly greater peak shoulder flexion angle. In contrast, the peak elbow flexion  
467 angle was significantly greater on the non-paralyzed side. During the return reaching motion,  
468 the motor time was significantly longer on the paralyzed side and the peak angular velocities of  
469 elbow flexion, shoulder flexion, shoulder abduction, and elbow flexion were significantly  
470 greater on the paralyzed side. Next, to detect the cutoff values of the motor features that  
471 discriminate between the paralyzed and non-paralyzed sides, binomial logistic regression  
472 analysis was conducted on the features fitted to the models for the paralyzed and non-paralyzed  
473 sides using multivariate analysis of covariance. For the features fitted to the regression model,  
474 the cutoff values discriminating between the paralyzed and non-paralyzed sides were calculated  
475 using the ROC curve. As a result, during the outward reaching motion, the motor time, peak  
476 angular velocity of shoulder flexion, and peak angular velocity of elbow flexion were calculated  
477 to be 1.6 s, 55°, and 145°, respectively. During the return reaching motion, the motor time, peak  
478 elbow joint flexion angle, peak angular velocity of shoulder abduction, and peak angular  
479 velocity of elbow flexion were calculated to be 1.6 s, 145°, 53°/s, and 62°/s, respectively.

480 Therefore, the calculated cutoff values can be used as the target values for treatment to improve  
481 the reaching motion to the occiput in patients with mild hemiplegia.

482           Among the cutoff values detected, the kinematic feature with the highest Youden's  
483 index was the motor time for both the outward and return reaching motions. Previous studies  
484 have reported that patients with stroke have a longer motor time, and the most difficult subitem  
485 in the FMA-UE is the motor time in Part D [47,48]. Motor time is presumed to be an index that  
486 determines whether the reaching motion to the occiput in a patient is a near-normal motion. In  
487 this study, the cutoff value for the peak elbow flexion angle was 145° for both the outward and  
488 return reaching motions. Hairdressing with a reaching motion to the back of the head requires  
489 the highest elbow joint flexion angle among the verified daily activities [49]. Hence, we inferred  
490 that sufficient elbow joint flexion is important to reach the occiput. In the outward reaching  
491 motion, the peak angle was significantly larger on the paralyzed side during shoulder flexion  
492 and on the non-paralyzed side during elbow flexion. Reaching the paralyzed side in patients  
493 with stroke has been reported to result in decreased coordination of the shoulder and elbow joint  
494 movements [50]. In the outward motion of reaching training, the goal of the exercise is to  
495 shorten the motor time and increase the elbow flexion angle more than the shoulder flexion  
496 angle. The cutoff values for angular acceleration of the joints were detected in the return  
497 reaching motion. When the hand reached the occiput, the upper limb was in abduction at the  
498 shoulder joint and flexion at the elbow joint, which is the joint motion pattern of the flexor  
499 muscles of the upper limb that appears after a stroke [51,52]. A previous study reported that  
500 muscle spasticity affects the angular acceleration of joints in reaching exercises using the  
501 paralyzed upper limb in patients with stroke [53]. The limb position, in which the hand reaches  
502 the occiput, induces a joint movement pattern of the upper limb and tends to increase the muscle  
503 tone of the flexor muscle group. Therefore, it may be difficult to control the angular velocity of  
504 the joint when the upper limb is lowered. In the return motion of reaching training, the practice

505 goal is to shorten the movement time and decrease the angular velocity of shoulder abduction  
506 and elbow flexion.

507 In the present study, changes in the motion time and the joint angle of the paralyzed  
508 and non-paralyzed sides during the reaching motion to the occipital region were analyzed using  
509 random forest clustering. Using these results as a reference, one practical strategy is to  
510 approximate the cluster on the paralyzed side to the cluster on the non-paralyzed side of the  
511 patient. The motor time of cluster 1 on the paralyzed side in the reaching motion to the occiput  
512 was shorter than the cutoff value. The joint angles of cluster 1 in the paralyzed group were  
513 similar to those of cluster 1 in the non-paralyzed group. The motor time of cluster 2 on the  
514 paralyzed side was within and longer than the cutoff value. Cluster 2 on the paralyzed side  
515 exhibited a variety of joint angles similar to those of cluster 2 on the non-paralyzed side. For  
516 patients in cluster 2 on the paralyzed side whose motor time was approximately 1.6 s, we  
517 suggested that one of the exercises should be to shorten the motor time by reducing the variation  
518 in joint angles such that the hand can reach the occiput in the shortest distance. The motor times  
519 of patients in paralytic clusters 3 and 4 were longer than the cutoff values. Hence, we  
520 recommended that patients in paralytic clusters 3 and 4 practice joint movement patterns to  
521 approach the values of those in non-paralytic clusters 1 or 3. When targeting cluster 1 on the  
522 non-paralytic side, a method to reduce the changes in the joint angle and shorten the motor time  
523 exists. When targeting cluster 3 on the non-paralyzed side, patients in cluster 3 on the paralyzed  
524 side should be trained by increasing the angular changes in shoulder flexion and elbow flexion  
525 while aiming for a motor time near the cutoff value. For patients in cluster 4 on the paralyzed  
526 side, the motor time was aimed to be near the cutoff value, and the goals of practice were to  
527 decrease the angular change in shoulder abduction and increase the angular change in elbow  
528 flexion (S1 Table).

529 In the reaching motion from the occiput to the starting limb, the motion time of cluster  
530 1 on the paralyzed side was shorter than the cutoff value, and, as in the reaching motion to the

531 occiput, the motion pattern of cluster 1 on the paralyzed side was similar to that on the non-  
532 paralyzed side. The motor time of cluster 2 on the paralyzed side was within or near the cutoff  
533 value. For cluster 2 on the paralyzed side, one of the practice goals was to shorten the motor  
534 time. The motor times of clusters 3 and 4 on the paralyzed side were longer than the cutoff  
535 values. The joint angles of clusters 3 and 4 on the paralyzed side were similar to those of  
536 clusters 3 and 4 on the non-paralyzed side. These results suggest that there is no difference in  
537 the motion pattern between the paralyzed and non-paralyzed sides when reaching from the  
538 occiput to the starting position. For the reaching motion from the occiput to the starting position,  
539 we proposed a practice to control the angular velocity of shoulder abduction and elbow flexion,  
540 with the target motor time within or near the cutoff value (S1 Table).

541 This study had several limitations. First, the participants were patients with mild  
542 hemiplegia, whose condition persisted for more than 6 months; therefore, the obtained results  
543 should be used with caution in patients with early onset of the disease. Furthermore, eight of 10  
544 participants in this study had a mAs score of 1 point, and we did not include patients with  
545 significant spasticity. Patients with severe motor paralysis are more likely to have strong muscle  
546 spasticity and exhibit joint movement patterns in the upper limbs [54]. Patients with severe  
547 motor paralysis who are unable to reach the occiput with their hands may have difficulties in  
548 practicing joint movement patterns based on the results of this study. Second, we did not  
549 compare the movements of the paralyzed upper limbs of patients with stroke with those of  
550 healthy participants. Patients with post-stroke hemiplegia also suffer from motor paralysis of the  
551 trunk and lower limb muscles, and their balance function may be impaired [55,56], and, during  
552 the reaching motion, the trunk and lower limb functions influence the upper limb joint motion  
553 [57,58]. Therefore, in this study, the sitting posture at the time of measurement was defined in  
554 detail and the displacement of the markers attached to the trunk was used as an adjustment  
555 variable in the statistical analysis. Based on the results of the FMA-LE, BBS, and FRT, the  
556 participants in this study had mild motor paralysis of the lower limbs and good trunk and

557 balance function. However, how the lower limb and trunk movements as well as the balance  
558 strategies for sitting and holding positions were involved in upper limb movements requires  
559 further analysis. To target the upper limb movements of individuals with no motor paralysis, an  
560 analysis of the upper limb movements of healthy participants is required. Third, the relationship  
561 between the dominant hand and joint movement patterns was not examined. The right side was  
562 the dominant hand before the disease onset in all participants; however, the current dominant  
563 hand changed to the left in five participants. To verify the influence of the dominant hand, joint  
564 movement patterns should be compared under the same conditions as those of the dominant  
565 hand before the disease onset and at the time of measurement [59]. Fourth, the distal joints of  
566 the upper extremities were not analyzed. During the reaching motion, limitations in the joint  
567 range of motion in the forearm and wrist joints affect the shoulder joint motion [60]. In this  
568 study, the joint motions of the shoulder and elbow joints were analyzed; however, coordination  
569 with the distal joints of the upper limb was not verified. Fifth, the motor tasks were measured at  
570 patients' comfortable speeds. When the movement is measured at a specified speed, it may  
571 cause changes in the joint motion and compensatory movement strategies are needed [61,62]. It  
572 remains unclear whether the practice of movement patterns performed in accordance with the  
573 optimal movement time and angular velocity on the non-paralyzed side can restore motor  
574 paralysis. Further validation is needed to consider these limitations to clinically utilize the  
575 practice methods and target values to reproduce movements equivalent to those of the non-  
576 paralyzed side without the appearance of spasticity or compensatory movements when upper  
577 limb motor paralysis is mild.

578

## 579 **Conclusions**

580 In this study, the kinematic features and cutoff values while reaching the back of the  
581 head in patients with mild hemiplegia in the chronic phase were detected, and patterns of



582 changes in the joint angle were analyzed. Based on our findings, when patients with hemiplegia  
583 who can reach the back of the head practice with the goal of smoother upper limb motion, the  
584 motion patterns of the non-paralyzed upper limb can be referenced to set the target values of  
585 motion time, joint angle, and angular velocity. The motor time of the paralyzed upper limb was  
586 measured, and the corresponding clusters were referred to from the results of random forest  
587 clustering. The results of this study will be used to plan motor practice strategies that trace the  
588 pattern of joint angles of the upper limb without paralysis. Moreover, the results obtained in this  
589 study can be used as a reference to devise effective practice methods to improve the reaching  
590 motion to the back of the head.

591

## 592 **Acknowledgments**

593 We would like to thank the occupational therapists at the Department of Rehabilitation  
594 Medicine, Jikei University Hospital, for their cooperation in obtaining the data for this study.  
595 Moreover, we would like to thank Prof. Michito Namekawa and Prof. Satoshi Kido, Department  
596 of Rehabilitation, Graduate School of Health Science, Saitama Prefectural University, for their  
597 clinical advice for the successful completion of this study.

598

## 599 **Author contributions**

600 D.S., T.H. and M.A. collated the literature and conceived the study. D.S., T.H., N.K., T.Y., and  
601 Y.N. developed the protocol. D.S. recruited participants and conducted data collections. D.S.,  
602 T.H., K.K., and R.S. were involved in data analysis. D.S. wrote the first draft of the manuscript.  
603 T.H., N.K., T.Y., Y.N., and M.A. reviewed and edited the manuscript. All authors have agreed  
604 with the submitted version of the manuscript.

605

## 606   **References**

- 607       1. World Stroke Organization. Annual Report 2020. 2020 [accessed 2021 December 1].  
608           Available from: <https://www.world-stroke.org/about-wso/annual-reports>
- 609       2. Langhorne P, Bernhardt J, Kwakkel G. Stroke rehabilitation. *Lancet*.  
610           2011;377(9778):1693-1702. doi: 10.1016/S0140-6736(11)60325-5.
- 611       3. van Mierlo ML, van Heugten CM, Post MW, Hajós TR, Kappelle LJ, Visser-Meily JM.  
612           Quality of life during the first two years post stroke: the Restore4Stroke Cohort Study.  
613           *Cerebrovasc Dis*. 2016;41(1-2):19-26. doi: 10.1159/000441197.
- 614       4. Fugl-Meyer AR, Jääskö L. Post-stroke hemiplegia and ADL-performance. *Scand J*  
615           *Rehabil Med Suppl*. 1980;7:140-152.
- 616       5. Karger DW, Bayha F. Engineered work measurement: the principles, techniques and  
617           data of methods-time measurement, modern time and motion study, and related  
618           applications engineering data. 2nd ed. New York: Industrial Press, 1966.
- 619       6. World Health Organization. International Classification of Functioning, Disability and  
620           Health (ICF). 2001 [accessed 2021 December 1]. Available from:  
621           [https://www.who.int/standards/classifications/international-classification-of-](https://www.who.int/standards/classifications/international-classification-of-functioning-disability-and-health#:~:text=ICF%20is%20the%20WHO%20framework,and%20measure%20health%20and%20disability)  
622           [functioning-disability-and-](https://www.who.int/standards/classifications/international-classification-of-functioning-disability-and-health#:~:text=ICF%20is%20the%20WHO%20framework,and%20measure%20health%20and%20disability)  
623           [health#:~:text=ICF%20is%20the%20WHO%20framework,and%20measure%20health](https://www.who.int/standards/classifications/international-classification-of-functioning-disability-and-health#:~:text=ICF%20is%20the%20WHO%20framework,and%20measure%20health%20and%20disability)  
624           [%20and%20disability](https://www.who.int/standards/classifications/international-classification-of-functioning-disability-and-health#:~:text=ICF%20is%20the%20WHO%20framework,and%20measure%20health%20and%20disability)
- 625       7. Veeger HE, Magermans DJ, Nagels J, Chadwick EK, van der Helm FC. A kinematical  
626           analysis of the shoulder after arthroplasty during a hair combing task. *Clin Biomech*  
627           (Bristol, Avon). 2006;21 Suppl 1:S39-44. doi: 10.1016/j.clinbiomech.2005.09.012.
- 628       8. Magermans DJ, Chadwick EK, Veeger HE, van der Helm FC. Requirements for upper  
629           extremity motions during activities of daily living. *Clin Biomech* (Bristol, Avon).  
630           2005;20(6):591-599. doi: 10.1016/j.clinbiomech.2005.02.006.

- 631 9. Nakamura R, Moriyama S, Yamada Y, Seki K. Recovery of impaired motor function of  
632 the upper extremity after stroke. *Tohoku J Exp Med.* 1992;168(1):11-20.doi:  
633 10.1620/tjem.168.11.
- 634 10. Lyle RC. A performance test for assessment of upper limb function in physical  
635 rehabilitation treatment and research. *Int J Rehabil Res.* 1981;4(4):483-492. doi:  
636 10.1097/00004356-198112000-00001.
- 637 11. De Souza LH, Hower RL, Miller S. Assessment of recovery of arm control in  
638 hemiplegic stroke patients. 1. Arm function tests. *Int Rehabil Med.* 1980;2(1):3-9. doi:  
639 10.3109/09638288009163947.
- 640 12. Bernshtein NA. The co-ordination and regulation of movements. 1st English ed.  
641 Oxford: Pergamon Press; 1967. p. 196.
- 642 13. Brunnstrom S. Motor testing procedures in hemiplegia: based on sequential recovery  
643 stages. *Phys Ther.* 1966;46(4):357-375. doi: 10.1093/ptj/46.4.357.
- 644 14. Alt Murphy M, Häger CK. Kinematic analysis of the upper extremity after stroke - how  
645 far have we reached and what have we grasped? *Phys Ther Rev.* 2015;20(3):137-155.  
646 doi: 10.1179/1743288X15Y.0000000002
- 647 15. Alt Murphy M, Willén C, Sunnerhagen KS. Responsiveness of upper extremity  
648 kinematic measures and clinical improvement during the first three months after stroke.  
649 *Neurorehabil Neural Repair.* 2013;27(9):844-853. doi: 10.1177/1545968313491008.
- 650 16. Patterson TS, Bishop MD, McGuirk TE, Sethi A, Richards LG. Reliability of upper  
651 extremity kinematics while performing different tasks in individuals with stroke. *J Mot*  
652 *Behav.* 2011;43(2):121-130. doi: 10.1080/00222895.2010.548422.
- 653 17. Wagner JM, Rhodes JA, Patten C. Reproducibility and minimal detectable change of  
654 three-dimensional kinematic analysis of reaching tasks in people with hemiparesis after  
655 stroke. *Phys Ther.* 2008;88(5):652-663. doi: 10.2522/ptj.20070255.

- 656 18. Caimmi M, Carda S, Giovanzana C, Maini ES, Sabatini AM, Smania N, et al. Using  
657 kinematic analysis to evaluate constraint-induced movement therapy in chronic stroke  
658 patients. *Neurorehabil Neural Repair*. 2008;22(1):31-39. doi:  
659 10.1177/1545968307302923.
- 660 19. Schwarz A, Kanzler CM, Lambercy O, Luft AR, Veerbeek JM. Systematic review on  
661 kinematic assessments of upper limb movements after stroke. *Stroke*. 2019;50(3):718-  
662 727. doi: 10.1161/STROKEAHA.118.023531.
- 663 20. Chen YW, Liao WW, Chen CL, Wu CY. Kinematic descriptions of upper limb function  
664 using simulated tasks in activities of daily living after stroke. *Hum Mov Sci*.  
665 2021;79:102834. doi: 10.1016/j.humov.2021.102834.
- 666 21. Kim K, Song WK, Lee J, Lee HY, Park DS, Ko BW, et al. Kinematic analysis of upper  
667 extremity movement during drinking in hemiplegic subjects. *Clin Biomech (Bristol,*  
668 *Avon)*. 2014;29(3):248-256. doi: 10.1016/j.clinbiomech.2013.12.013.
- 669 22. van Andel CJ, Wolterbeek N, Doorenbosch CA, Veeger DH, Harlaar J. Complete 3D  
670 kinematics of upper extremity functional tasks. *Gait Posture*. 2008;27(1):120-127. doi:  
671 10.1016/j.gaitpost.2007.03.002.
- 672 23. Kwakkel G, van Wegen EEH, Burridge JH, Winstein CJ, van Dokkum LEH, Alt  
673 Murphy M, et al. Standardized measurement of quality of upper limb movement after  
674 stroke: consensus-based core recommendations from the Second Stroke Recovery and  
675 Rehabilitation Roundtable. *Neurorehabil Neural Repair*. 2019;33(11):951-958. doi:  
676 10.1177/1545968319886477.
- 677 24. de Paiva Silva FP, Freitas SM, Silva PV, Banjai RM, Alouche SR. Ipsilesional arm  
678 motor sequence performance after right and left hemisphere damage. *J Mot Behav*.  
679 2014;46(6):407-414. doi: 10.1080/00222895.2014.924473.

- 680 25. Schwarz A, Veerbeek JM, Held JPO, Buurke JH, Luft AR. Measures of interjoint  
681 coordination post-stroke across different upper limb movement tasks. *Front Bioeng*  
682 *Biotechnol.* 2020;8:620805. doi: 10.3389/fbioe.2020.620805.
- 683 26. Woodbury ML, Velozo CA, Richards LG, Duncan PW. Rasch analysis staging  
684 methodology to classify upper extremity movement impairment after stroke. *Arch Phys*  
685 *Med Rehabil.* 2013;94(8):1527-1533. doi: 10.1016/j.apmr.2013.03.007.
- 686 27. Cirstea MC, Mitnitski AB, Feldman AG, Levin MF. Interjoint coordination dynamics  
687 during reaching in stroke. *Exp Brain Res.* 2003;151(3):289-300. doi: 10.1007/s00221-  
688 003-1438-0.
- 689 28. Yuji K, Makoto S, Akihisa O, Kazuhisa T, Yasuhiro T, Toyohiro H. Distinction of  
690 students and expert therapists based on therapeutic motions on a robotic device using  
691 support vector machine. *J Med Biol Eng.* 2020;40:790-797. doi: 10.1007/s40846-020-  
692 00562-3
- 693 29. Limited VMS. Plug-in Gait reference guide. 2021 [accessed 2021 December 1].  
694 Available from:  
695 <https://docs.vicon.com/display/Nexus212/PDF+downloads+for+Vicon+Nexus>
- 696 30. Fugl-Meyer AR, Jääskö L, Leyman I, Olsson S, Steglind S. The post-stroke hemiplegic  
697 patient. 1. a method for evaluation of physical performance. *Scand J Rehabil Med.*  
698 1975;7(1):13-31. doi: 10.2340/1650197771331
- 699 31. Carroll D. A quantitative test of upper extremity function. *J Chronic Dis.* 1965;18:479-  
700 491. doi: 10.1016/0021-9681(65)90030-5.
- 701 32. Desrosiers J, Bravo G, Hébert R, Dutil E, Mercier L. Validation of the Box and Block  
702 Test as a measure of dexterity of elderly people: reliability, validity, and norms studies.  
703 *Arch Phys Med Rehabil.* 1994;75(7):751-755. doi: 10.1016/0003-9993(94)90130-9

- 704 33. Mathiowetz V, Volland G, Kashman N, Weber K. Adult norms for the Box and Block  
705 Test of manual dexterity. *Am J Occup Ther.* 1985;39(6):386-391. doi:  
706 10.5014/ajot.39.6.386.
- 707 34. Bohannon RW, Smith MB. Interrater reliability of a modified Ashworth scale of muscle  
708 spasticity. *Phys Ther.* 1987;67(2):206-207. doi: 10.1093/ptj/67.2.206.
- 709 35. Berg KO, Wood-Dauphinee SL, Williams JI, Maki B. Measuring balance in the elderly:  
710 validation of an instrument. *Can J Public Health.* 1992;83 Suppl 2:S7-11.
- 711 36. Berg K. Measuring balance in the elderly: preliminary development of an instrument.  
712 *Physiother Can.* 1989;41(6):304-311. doi: 10.3138/ptc.41.6.304
- 713 37. Duncan PW, Weiner DK, Chandler J, Studenski S. Functional reach: a new clinical  
714 measure of balance. *J Gerontol.* 1990;45(6):M192-7. doi: 10.1093/geronj/45.6.m192.
- 715 38. Bell-Krotoski J, Tomancik E. The repeatability of testing with Semmes-Weinstein  
716 monofilaments. *J Hand Surg Am.* 1987;12(1):155-161. doi: 10.1016/s0363-  
717 5023(87)80189-2.
- 718 39. Hirai K. Maternal finger search test - examination of joint localization disorder (in  
719 Japanese). *Clin Neurol.* 1986;26:448-454.
- 720 40. Mahoney FI, Barthel DW. Functional evaluation: the Barthel Index. *Md State Med J.*  
721 1965;14:61-65. doi: 10.1037/t02366-000
- 722 41. Oldfield RC. The assessment and analysis of handedness: the Edinburgh inventory.  
723 *Neuropsychologia.* 1971;9(1):97-113. doi: 10.1016/0028-3932(71)90067-4.
- 724 42. DeLong ER, DeLong DM, Clarke-Pearson DL. Comparing the areas under two or more  
725 correlated receiver operating characteristic curves: a nonparametric approach.  
726 *Biometrics.* 1988;44(3):837-845. doi: 10.2307/2531595
- 727 43. Tibshirani R, Walther G, Hastie T. Estimating the number of clusters in a data set via  
728 the gap statistic. *J R Stat Soc Series B Stat Methodol.* 2001;63(2):411-423. doi:  
729 10.1111/1467-9868.00293

- 730 44. Breiman L. Random forests. *Mach Learn.* 2001;45:5-32. doi:  
731 10.1023/A:1010933404324
- 732 45. Schwarz G. Estimating the dimension of a model. *Ann Stat.* 1978;6(2):461-464. doi:  
733 10.1214/aos/1176344136
- 734 46. Thorndike RL. Who belongs in the family? *Psychometrika.* 1953;18:267-276. doi:  
735 10.1007/BF02289263
- 736 47. Tauchi Y, Kyougoku M, Takahashi K, Okita Y, Takebayashi T. Dimensionality and  
737 item-difficulty hierarchy of the Fugl-Meyer assessment of the upper extremity among  
738 Japanese patients who have experienced stroke. *Top Stroke Rehabil.* 2022;29(8):579-  
739 587. doi: 10.1080/10749357.2021.1965797.
- 740 48. Collins KC, Kennedy NC, Clark A, Pomeroy VM. Getting a kinematic handle on reach-  
741 to-grasp: a meta-analysis. *Physiotherapy.* 2018;104(2):153-166. doi:  
742 10.1016/j.physio.2017.10.002.
- 743 49. Morrey BF, Askew LJ, Chao EY. A biomechanical study of normal functional elbow  
744 motion. *J Bone Joint Surg Am.* 1981;63(6):872-877. doi: 10.2106/00004623-  
745 198163060-00002
- 746 50. Schwarz A, Bhagubai MMC, Nies SHG, Held JPO, Veltink PH, Buurke JH, et al.  
747 Characterization of stroke-related upper limb motor impairments across various upper  
748 limb activities by use of kinematic core set measures. *J Neuroeng Rehabil.*  
749 2022;19(1):2. doi: 10.1186/s12984-021-00979-0.
- 750 51. Roh J, Rymer WZ, Beer RF. Evidence for altered upper extremity muscle synergies in  
751 chronic stroke survivors with mild and moderate impairment. *Front Hum Neurosci.*  
752 2015;9:6. doi: 10.3389/fnhum.2015.00006.
- 753 52. Roh J, Rymer WZ, Perreault EJ, Yoo SB, Beer RF. Alterations in upper limb muscle  
754 synergy structure in chronic stroke survivors. *J Neurophysiol.* 2013;109(3):768-781.  
755 doi: 10.1152/jn.00670.2012.

- 756 53. Lackritz H, Parmet Y, Frenkel-Toledo S, Baniña MC, Soroker N, Solomon JM, et al.  
757 Effect of post-stroke spasticity on voluntary movement of the upper limb. *J Neuroeng*  
758 *Rehabil.* 2021;18(1):81. doi: 10.1186/s12984-021-00876-6.
- 759 54. Hijikata N, Kawakami M, Ishii R, Tsuzuki K, Nakamura T, Okuyama K, et al. Item  
760 difficulty of Fugl-Meyer assessment for upper extremity in persons with chronic stroke  
761 with moderate-to-severe upper limb impairment. *Front Neurol.* 2020;11:577855. doi:  
762 10.3389/fneur.2020.577855.
- 763 55. Hugues A, Di Marco J, Ribault S, Ardaillon H, Janiaud P, Xue Y, et al. Limited  
764 evidence of physical therapy on balance after stroke: A systematic review and meta-  
765 analysis. *PLoS One.* 2019;14(8):e0221700. doi: 10.1371/journal.pone.0221700.
- 766 56. Sánchez N, Acosta AM, Lopez-Rosado R, Stienen AHA, Dewald JPA. Lower extremity  
767 motor impairments in ambulatory chronic hemiparetic stroke: evidence for lower  
768 extremity weakness and abnormal muscle and joint torque coupling patterns.  
769 *Neurorehabil Neural Repair.* 2017;31(9):814-826. doi: 10.1177/1545968317721974.
- 770 57. Tomita Y, Mullick AA, Levin MF. Reduced kinematic redundancy and motor  
771 equivalence during whole-body reaching in individuals with chronic stroke.  
772 *Neurorehabil Neural Repair.* 2018;32(2):175-186. doi: 10.1177/1545968318760725.
- 773 58. Tomita Y, Feldman AG, Levin MF. Referent control and motor equivalence of reaching  
774 from standing. *J Neurophysiol.* 2017;117(1):303-315. doi: 10.1152/jn.00292.2016.
- 775 59. Xiao X, Hu HJ, Li LF, Li L. Comparison of dominant hand to non-dominant hand in  
776 conduction of reaching task from 3D kinematic data: Trade-off between successful rate  
777 and movement efficiency. *Math Biosci Eng.* 2019;16(3):1611-1624. doi:  
778 10.3934/mbe.2019077.
- 779 60. Gates DH, Walters LS, Cowley J, Wilken JM, Resnik L. Range of motion requirements  
780 for upper-limb activities of daily living. *Am J Occup Ther.* 2016;70(1):7001350010p1-  
781 7001350010p10. doi: 10.5014/ajot.2016.015487.



- 782 61. Mandon L, Boudarham J, Robertson J, Bensmail D, Roche N, Roby-Brami A. Faster  
783 reaching in chronic spastic stroke patients comes at the expense of arm-trunk  
784 coordination. *Neurorehabil Neural Repair*. 2016;30(3):209-220. doi:  
785 10.1177/1545968315591704.
- 786 62. DeJong SL, Schaefer SY, Lang CE. Need for speed: better movement quality during  
787 faster task performance after stroke. *Neurorehabil Neural Repair*. 2012;26(4):362-373.  
788 doi: 10.1177/1545968311425926.

789

790

## 791 **Supporting information**

792 **S1 Table. Training methods devised from the pattern analysis results.**

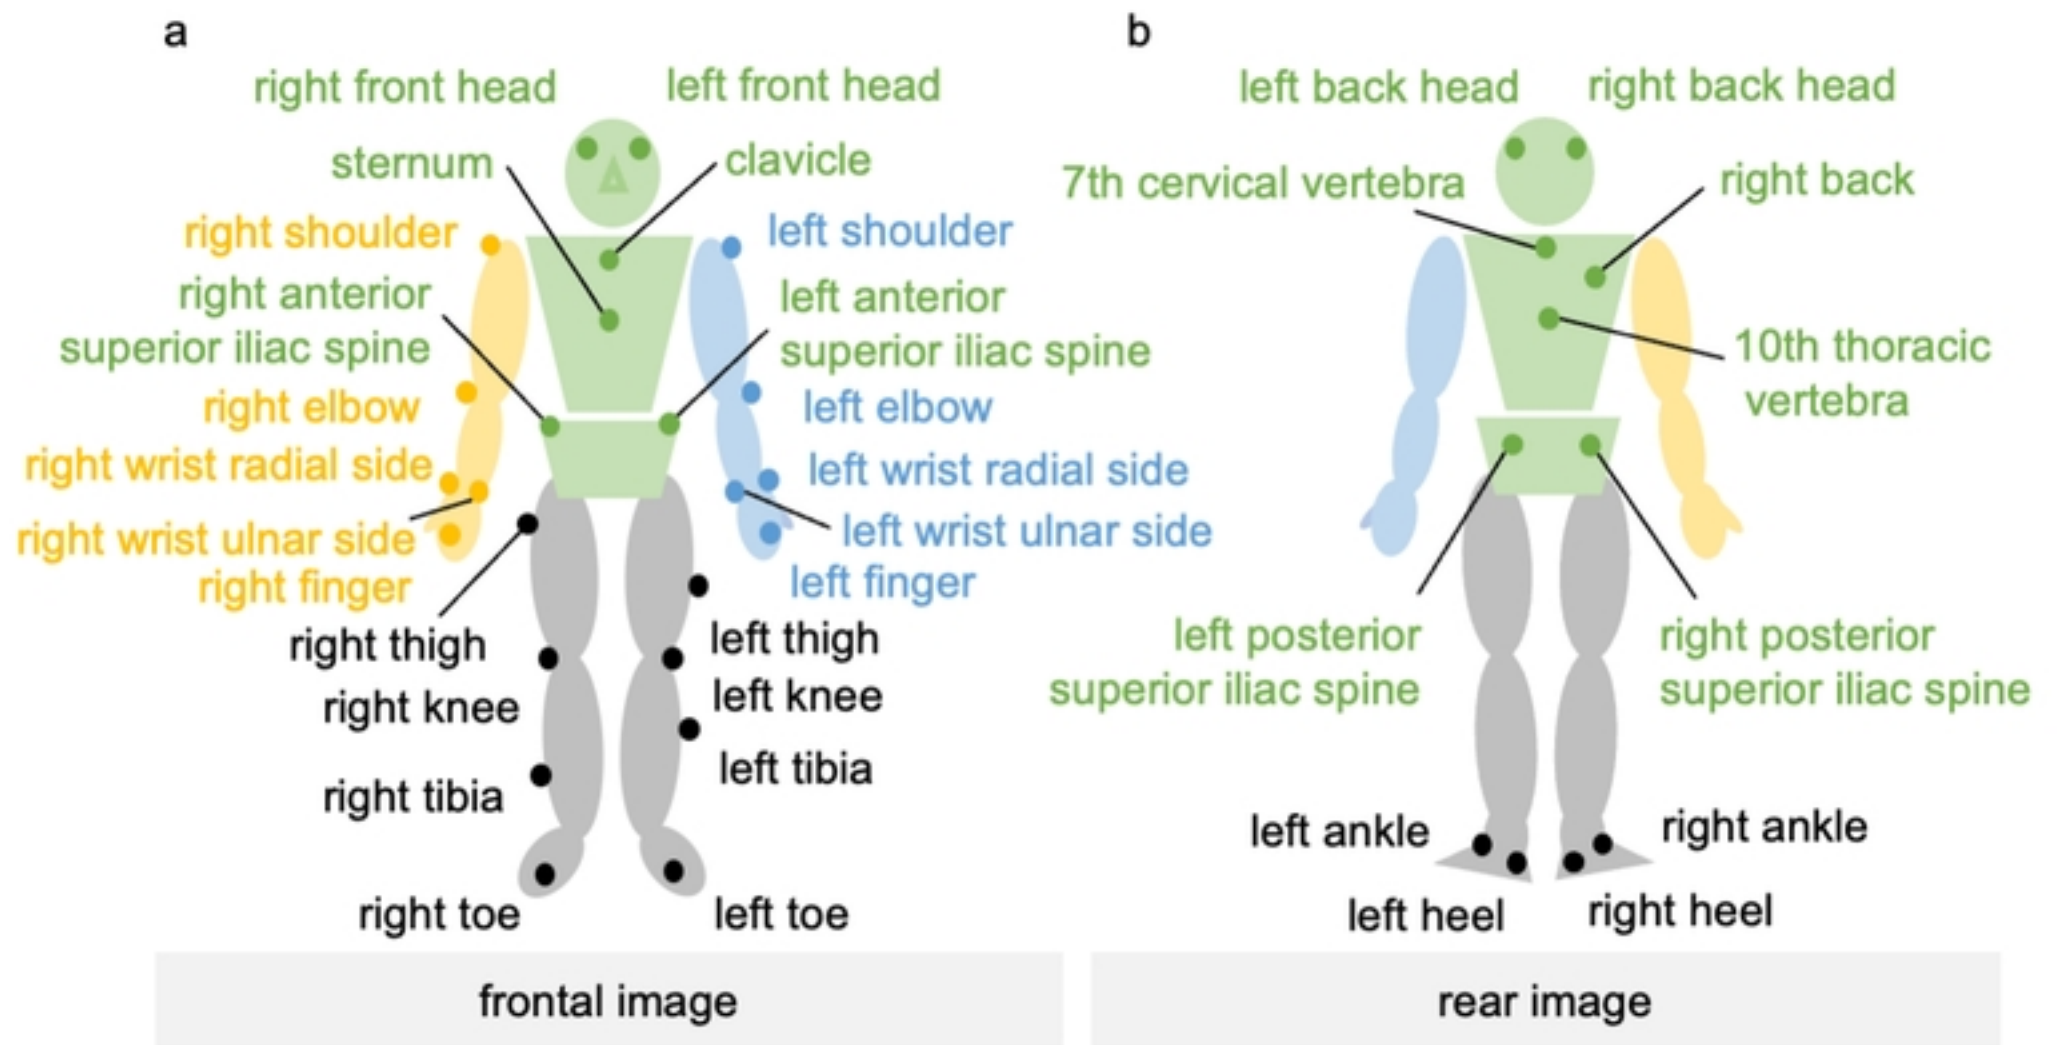

Figure 1

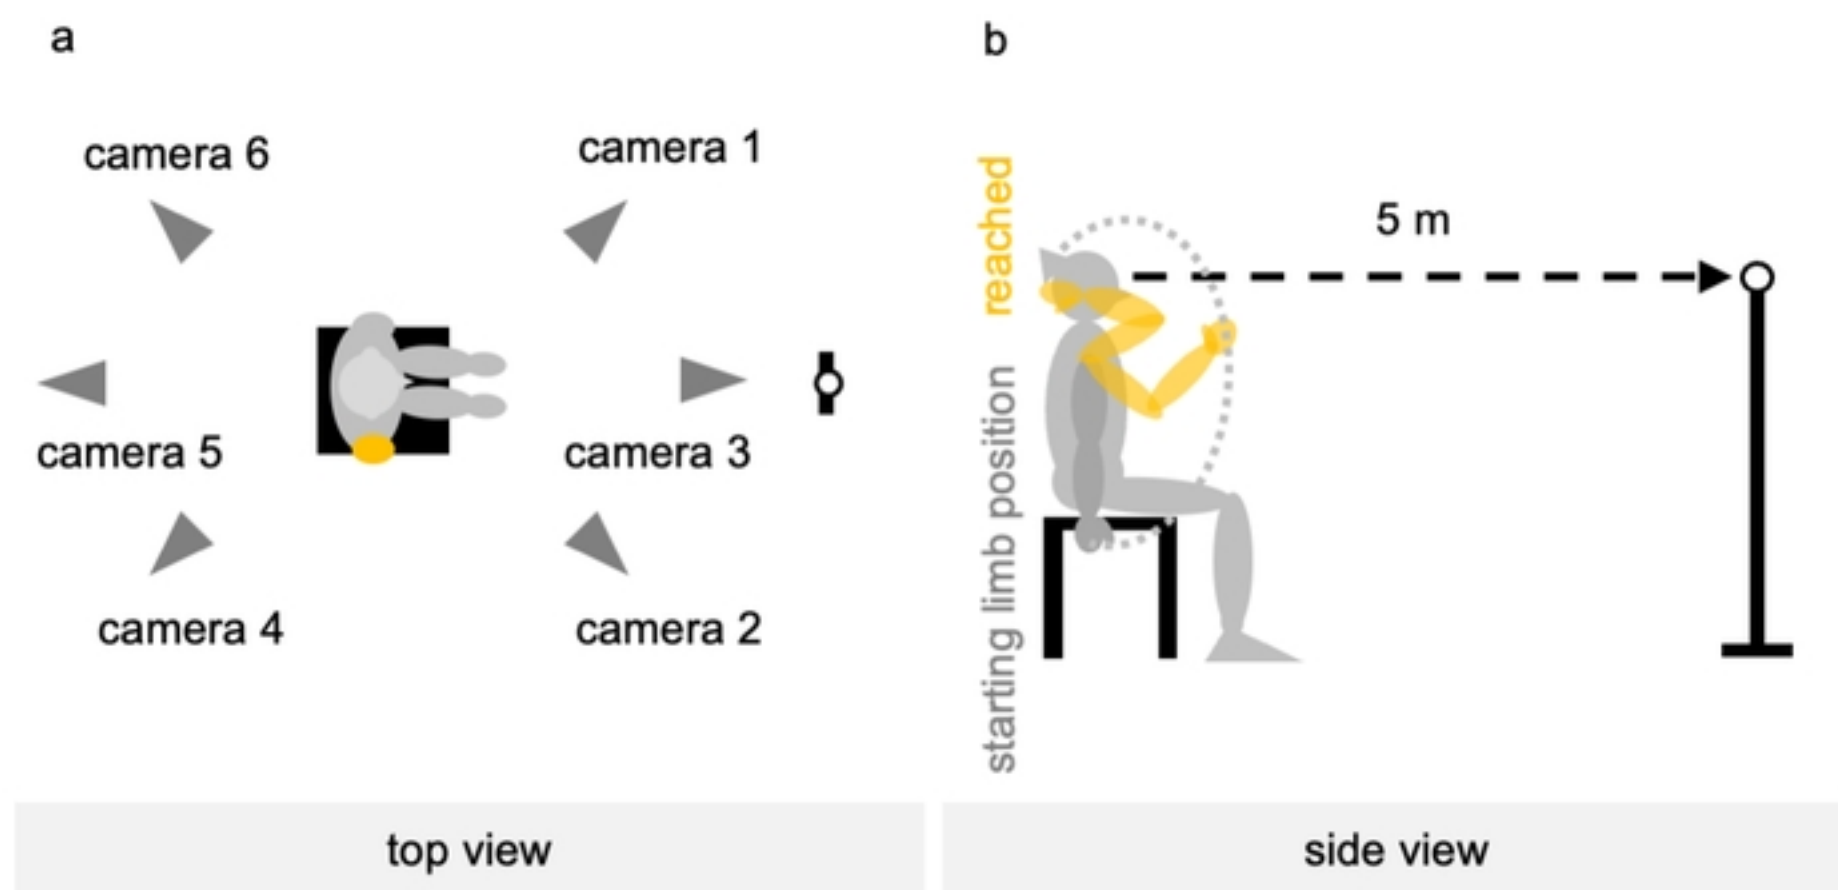

Figure 2

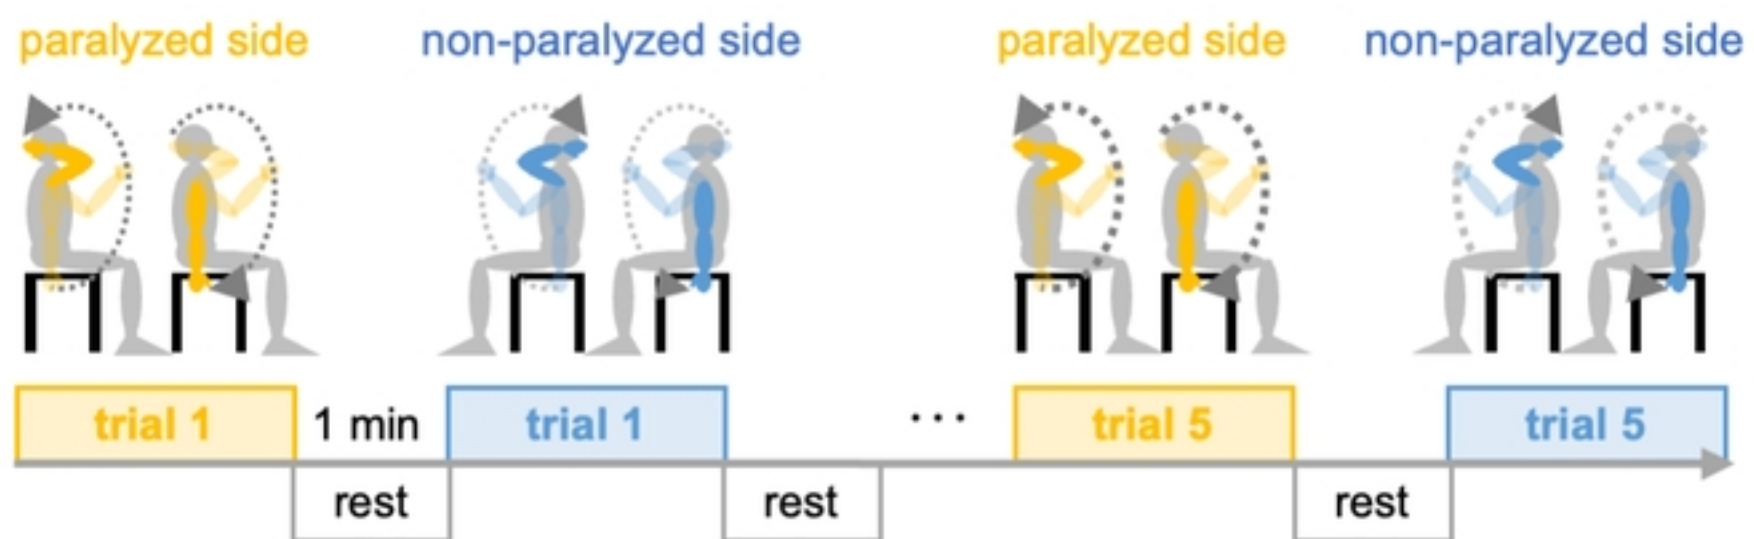

Figure 3

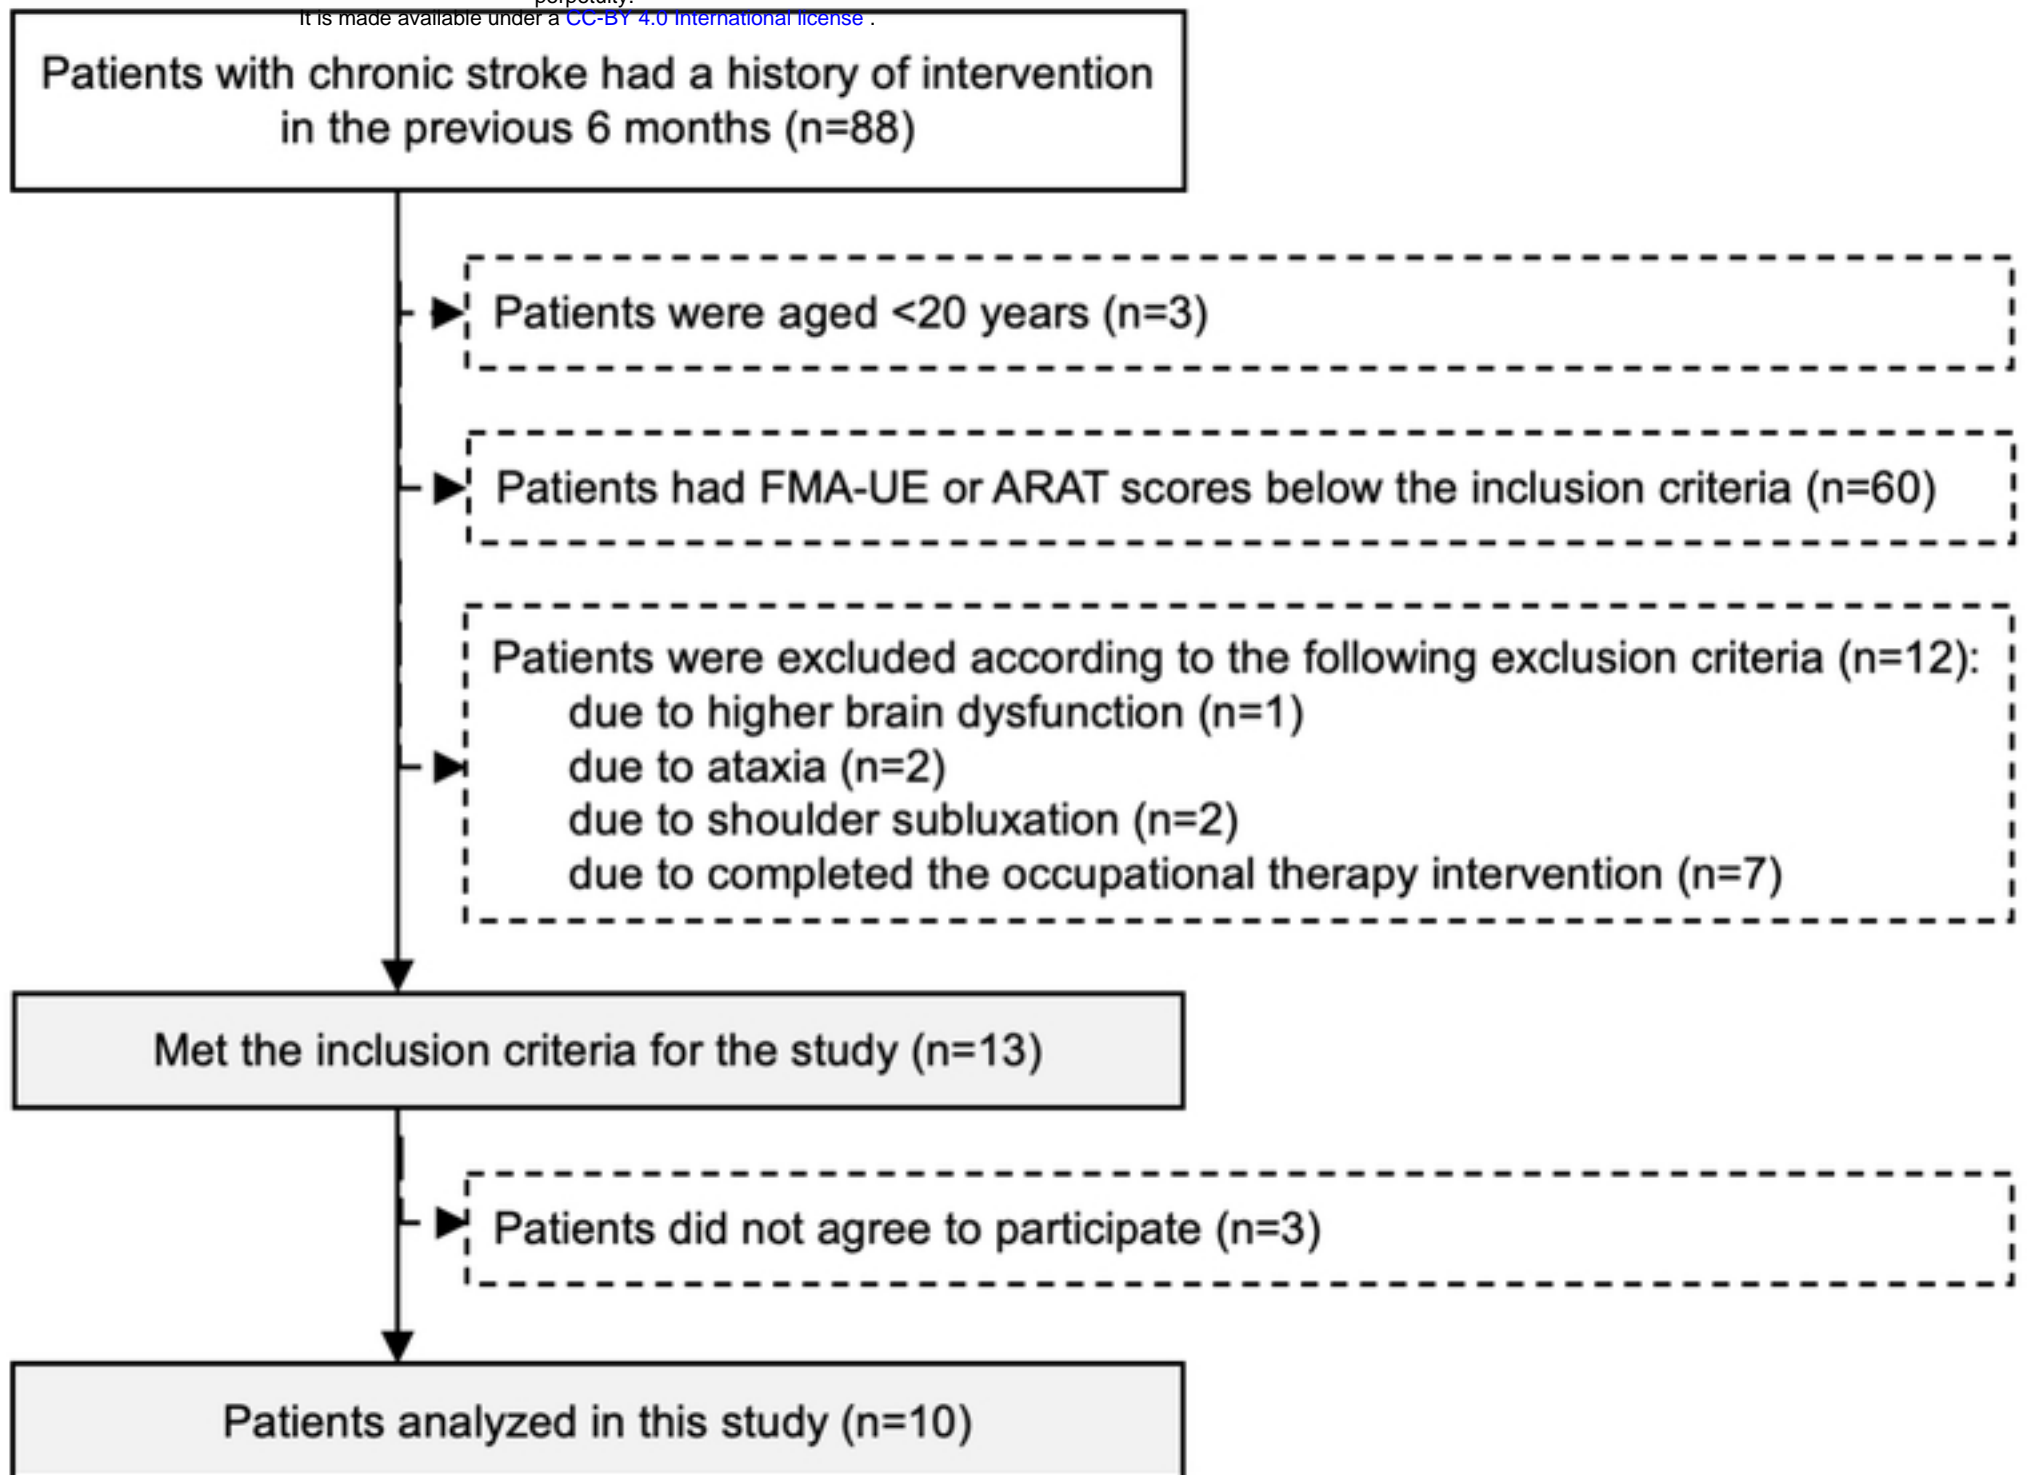

Figure 4

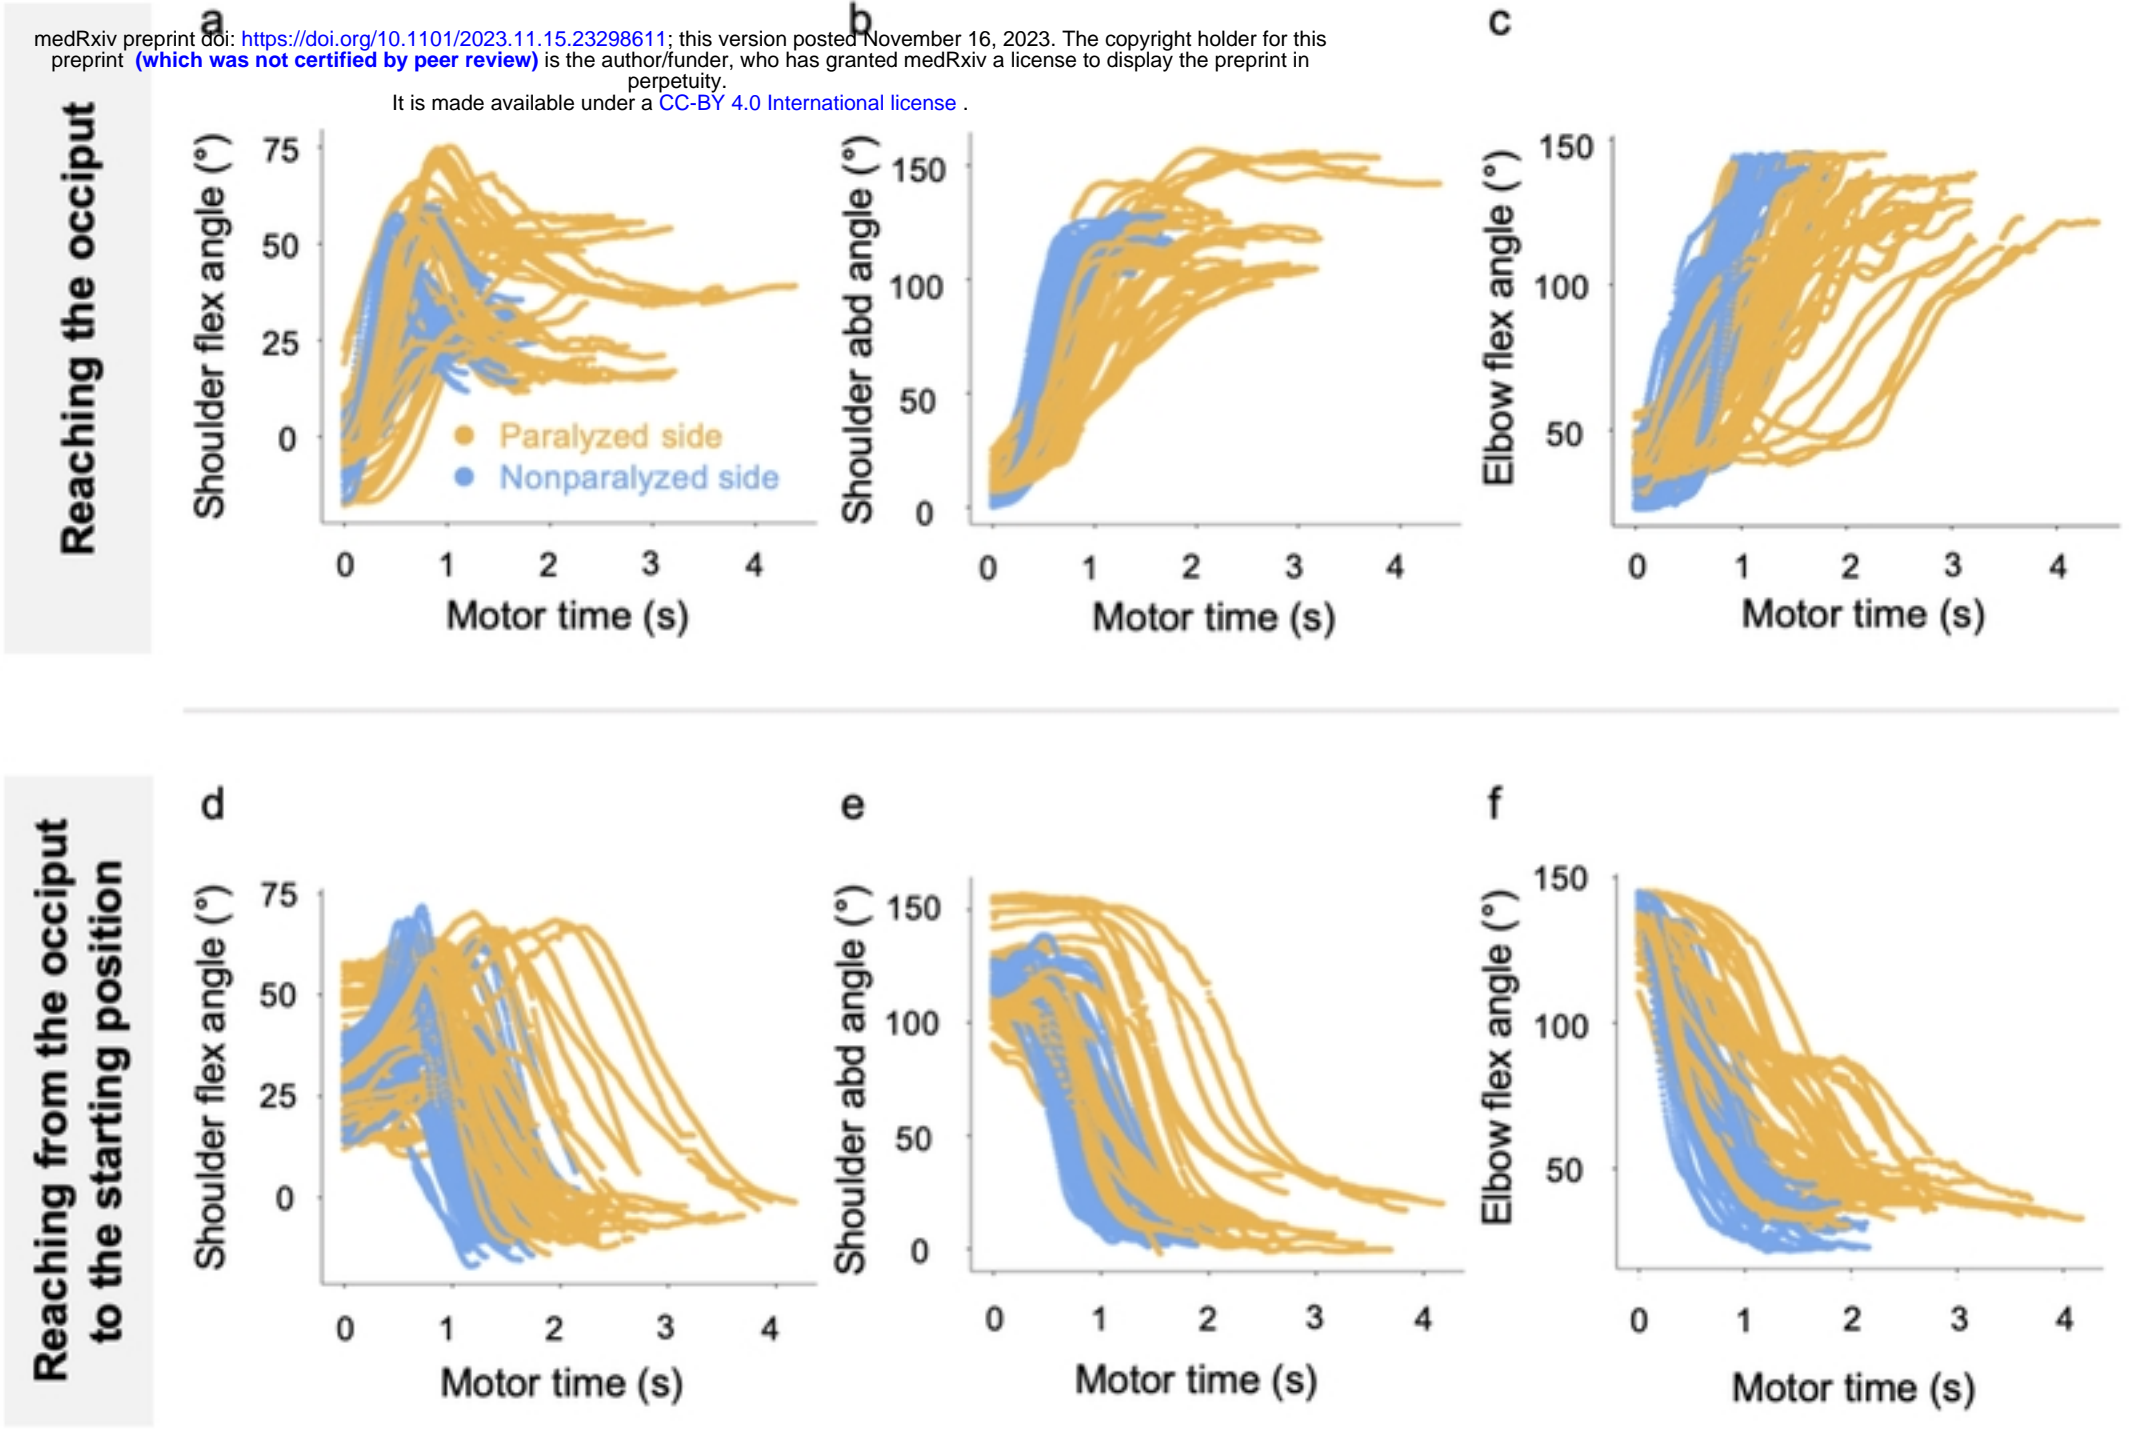

Figure 5



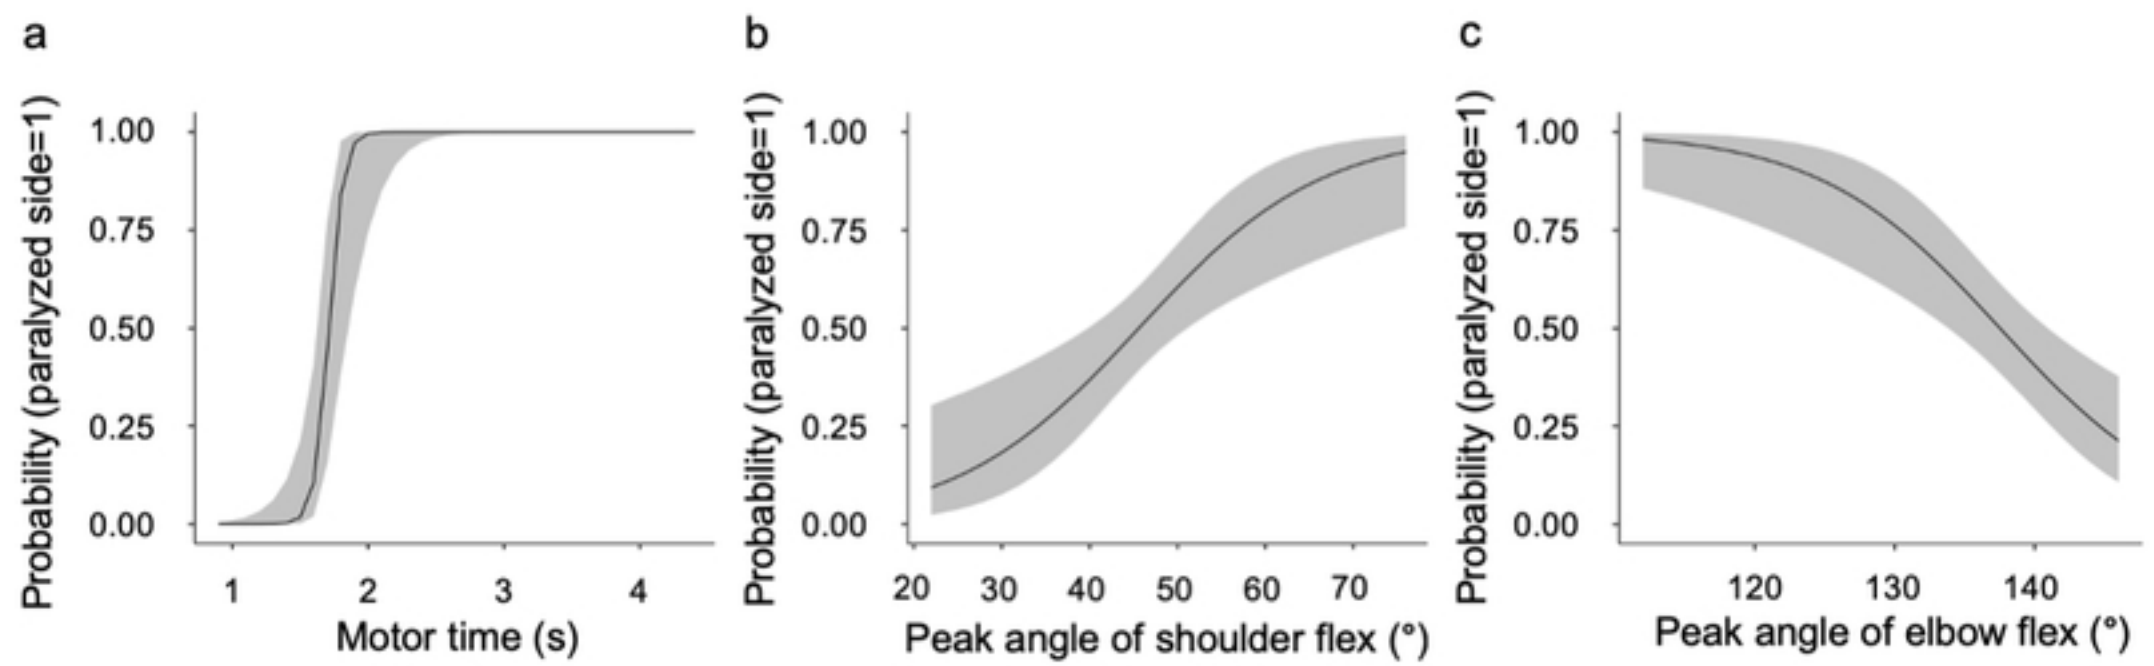

Figure 6

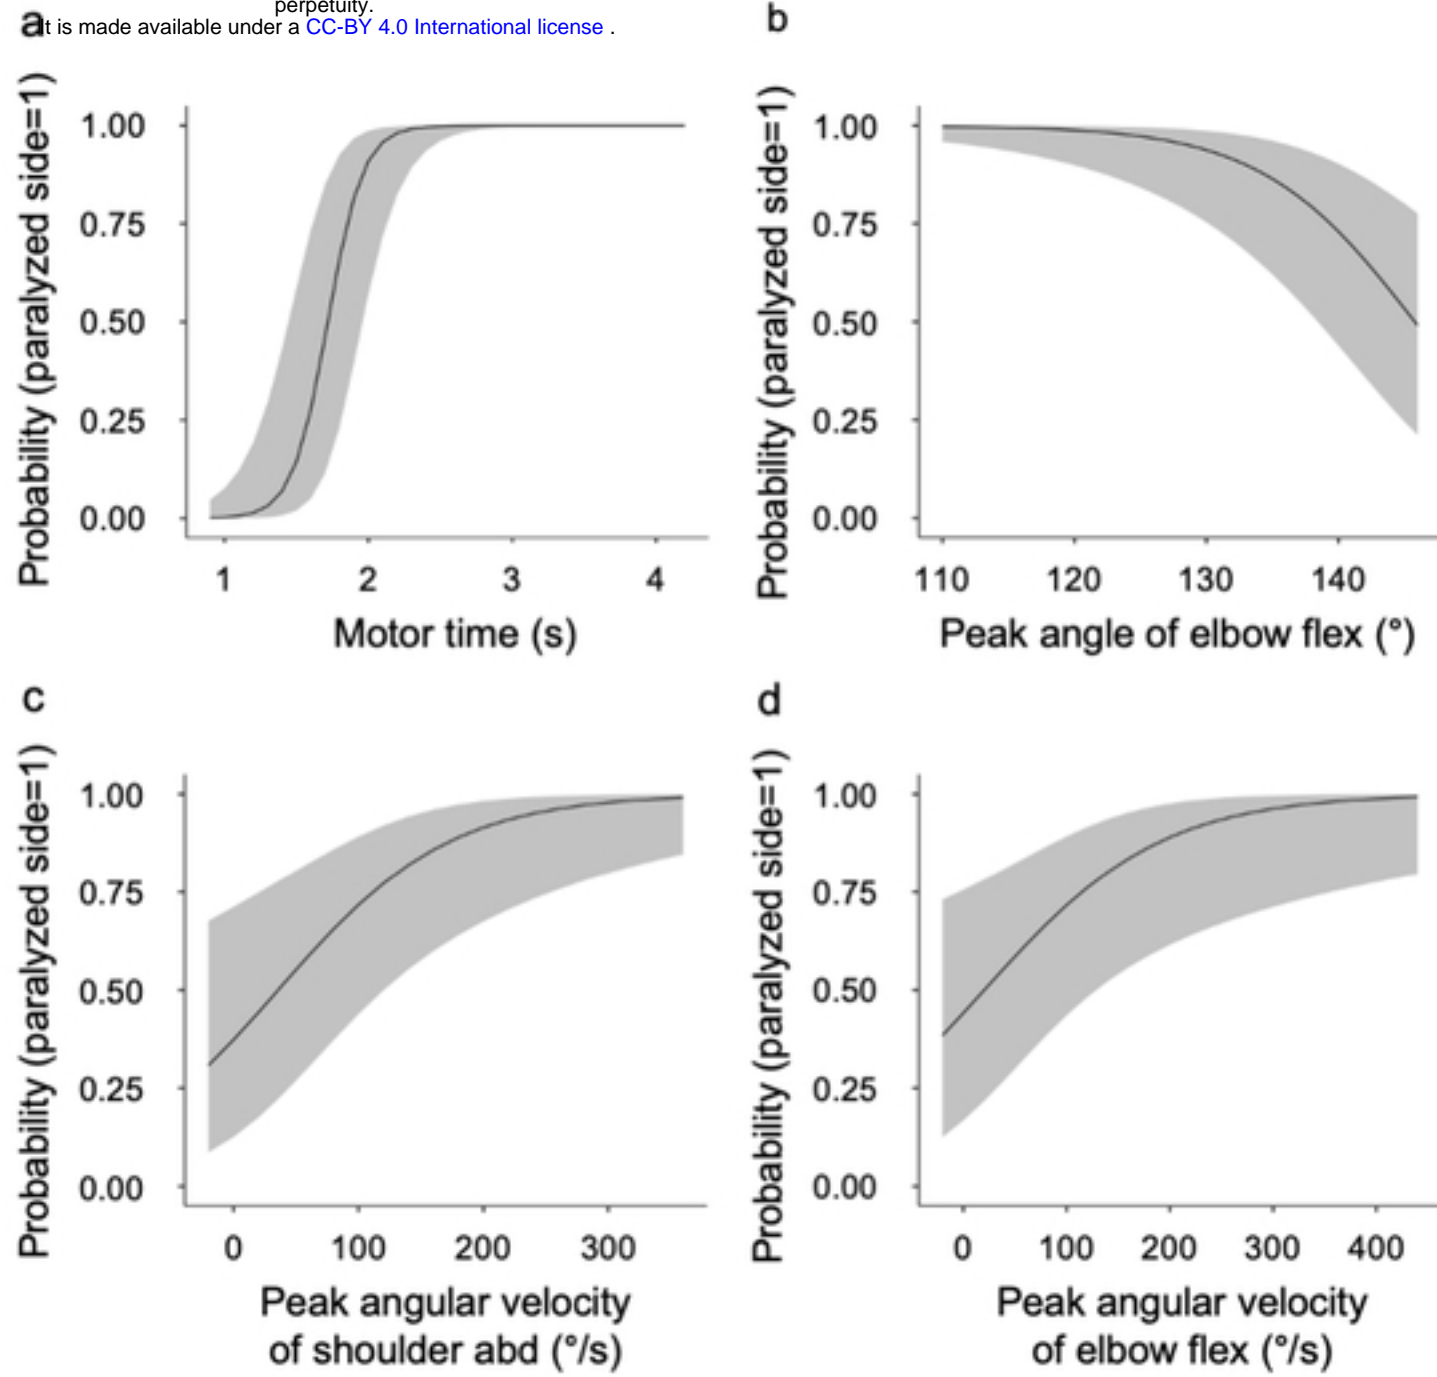

Figure 7



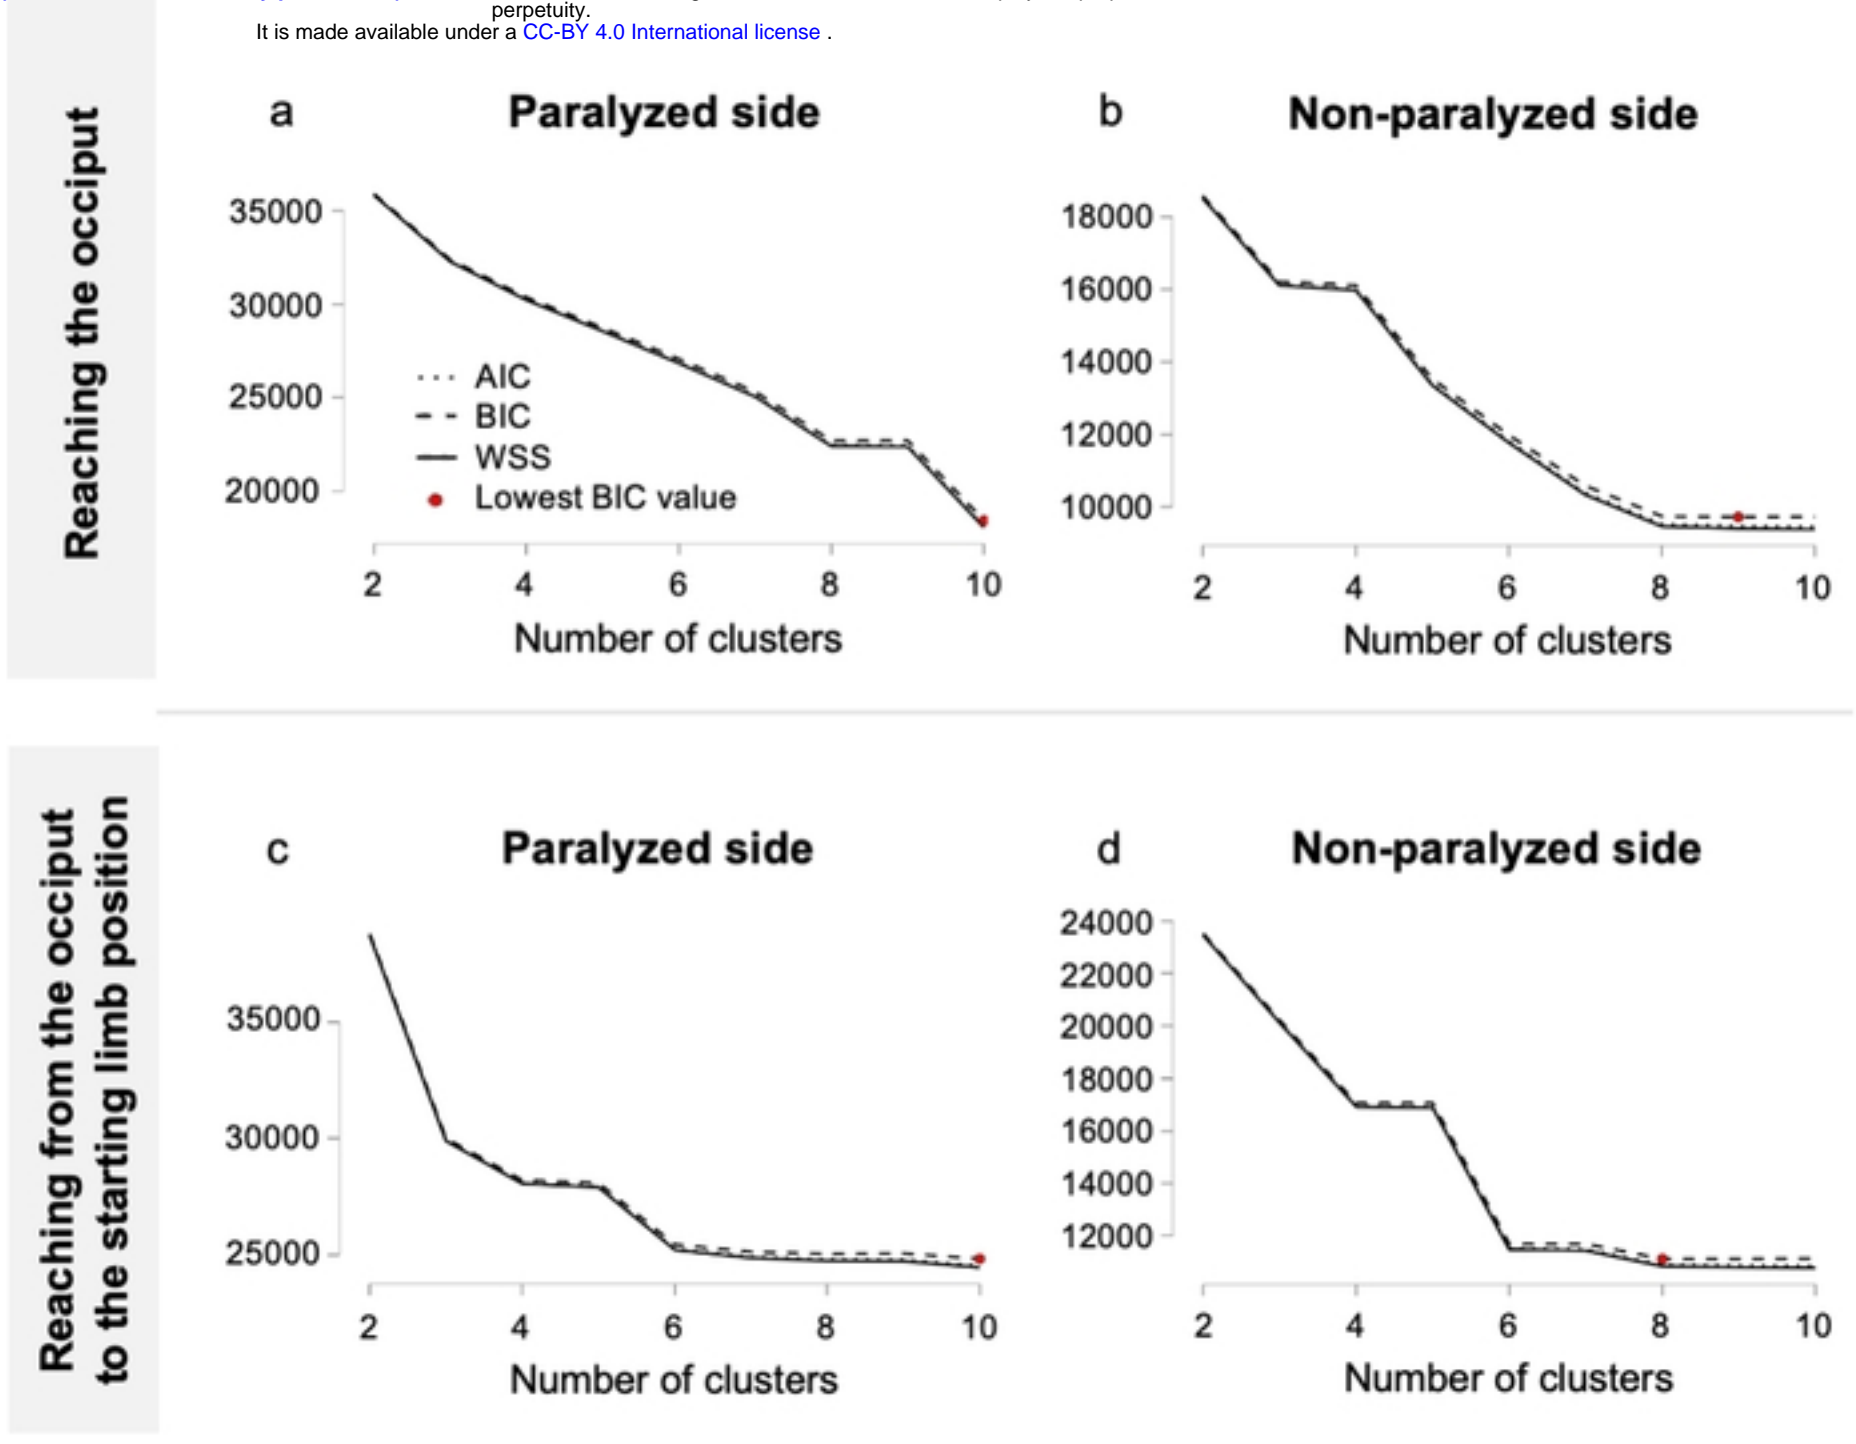

Figure 8

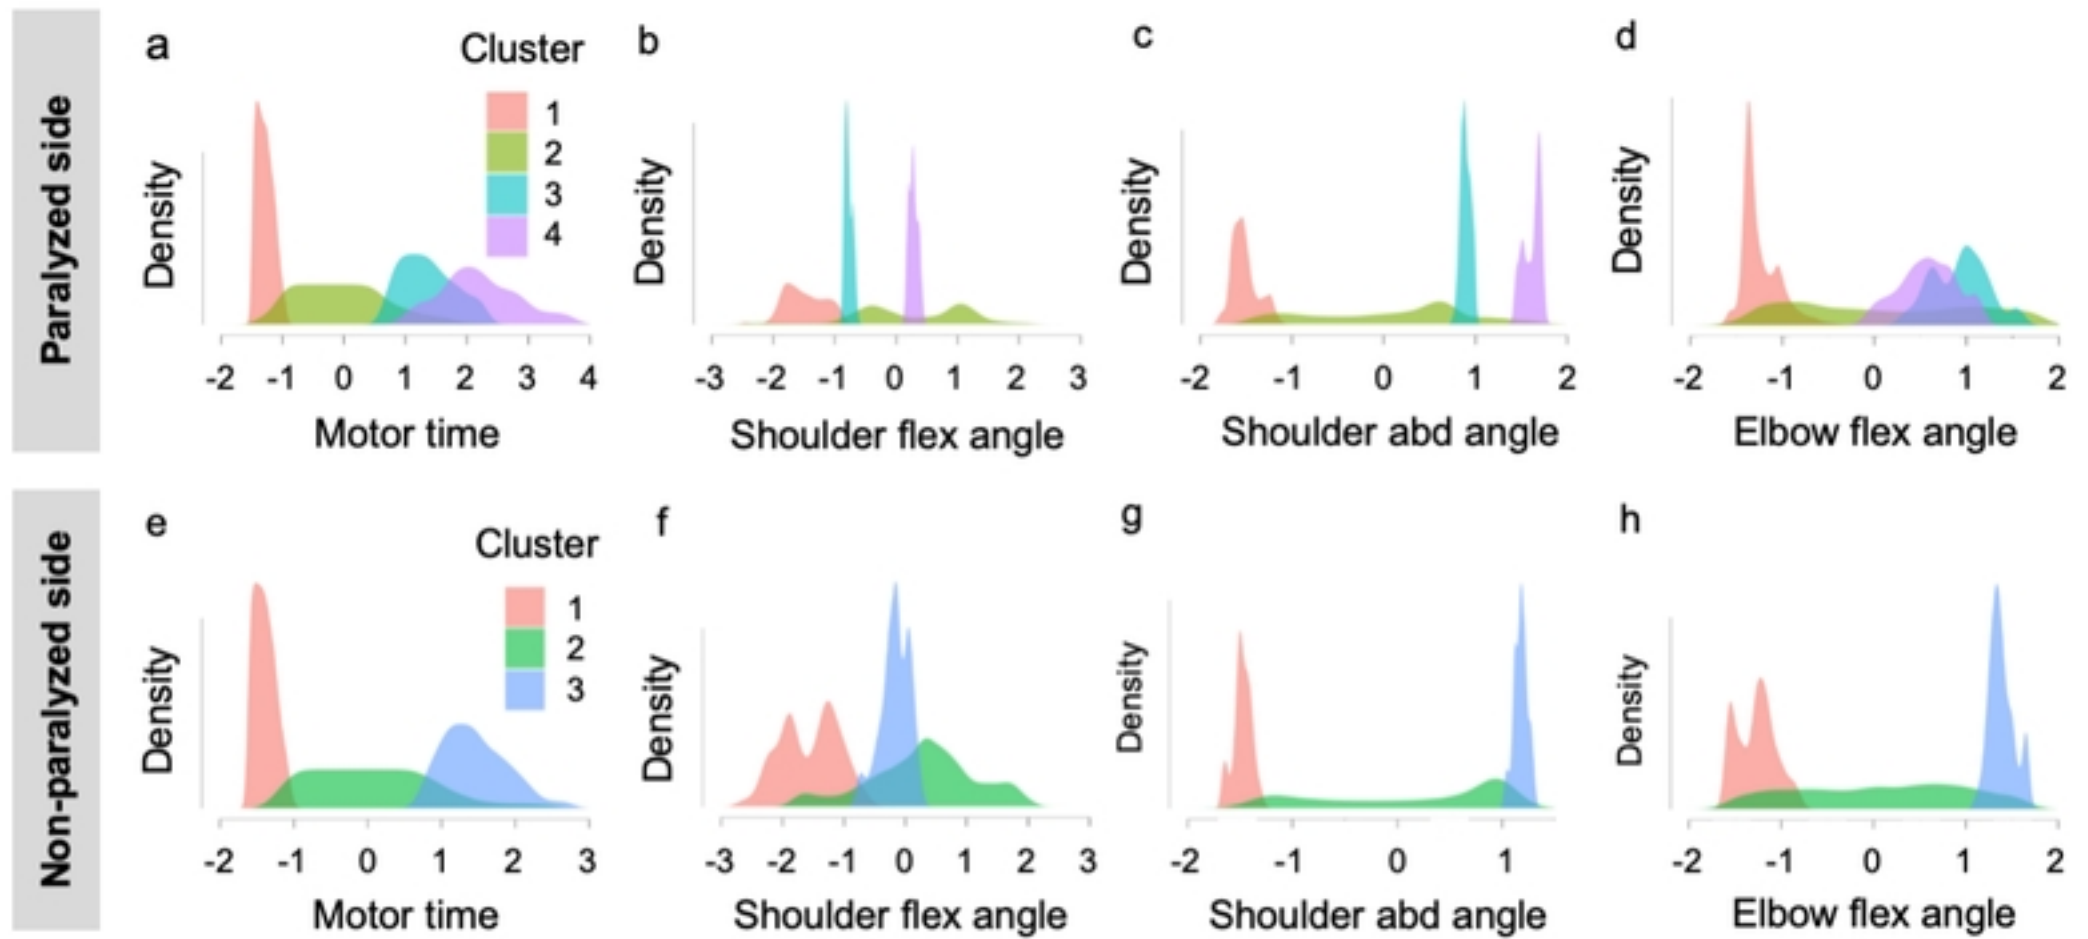

Figure 9

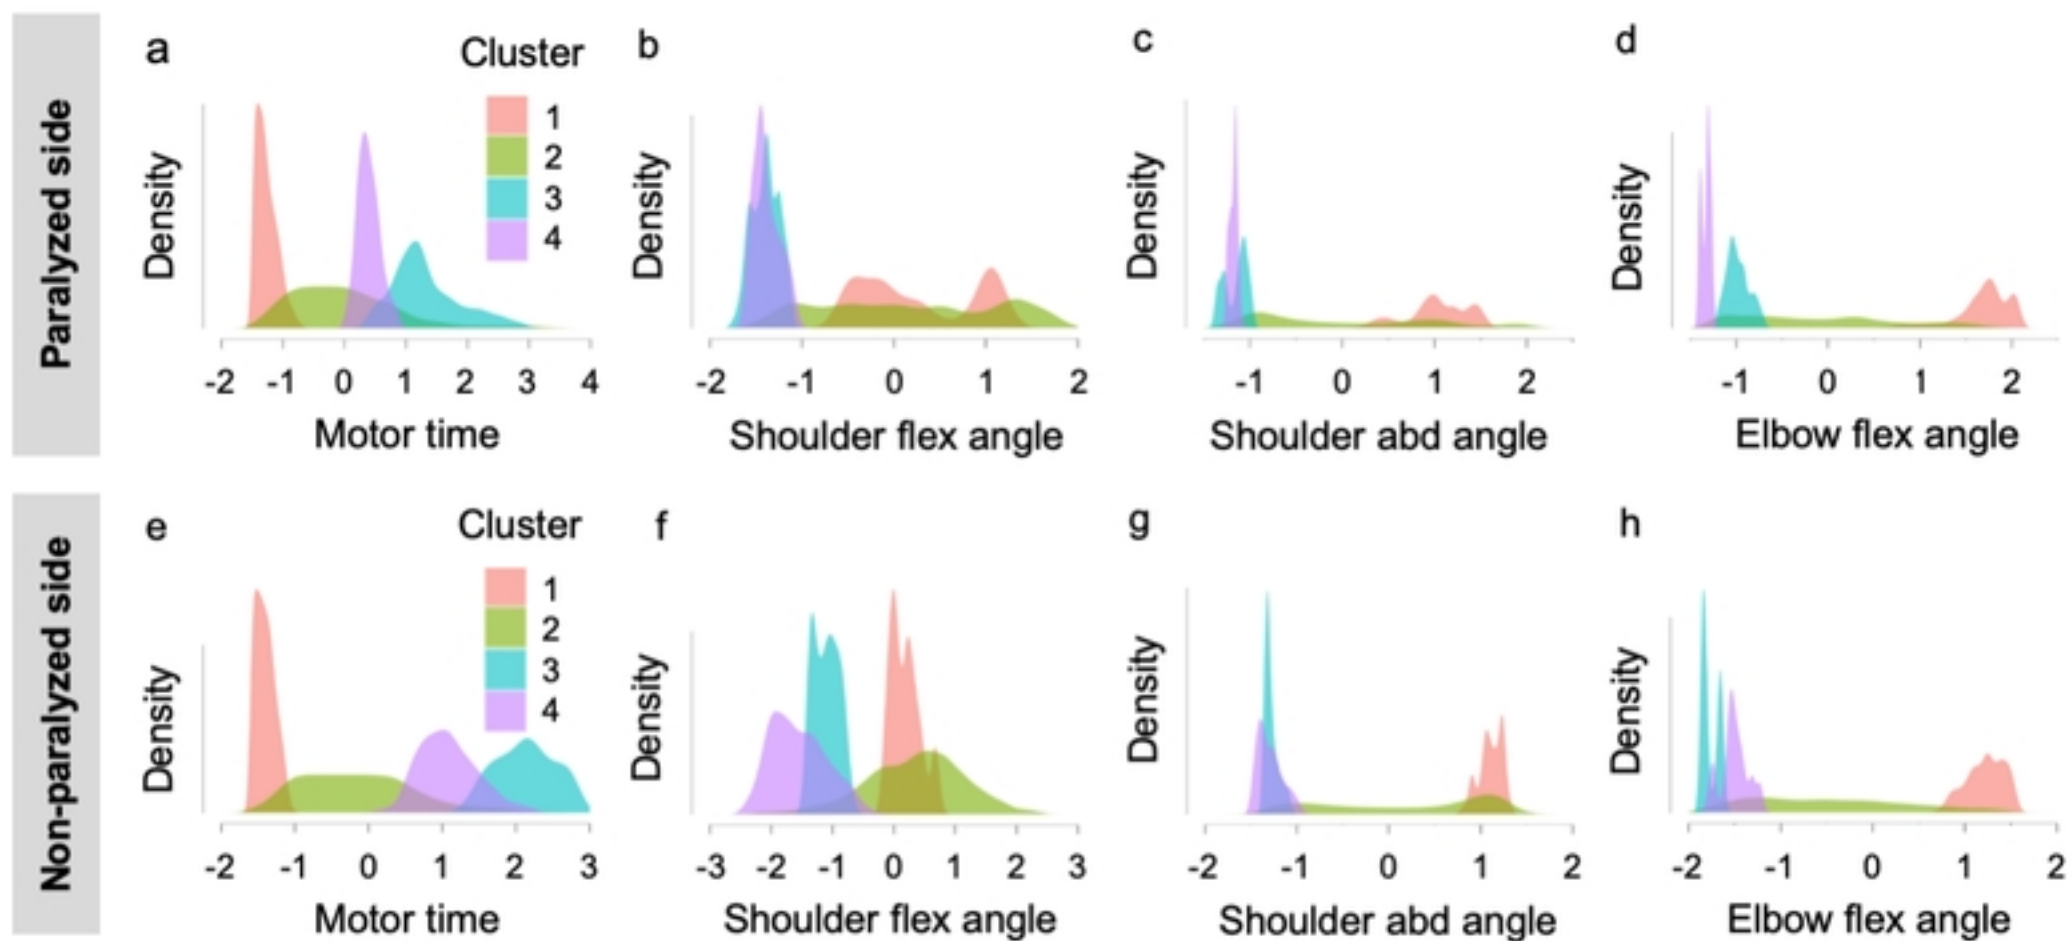

Figure 10
